# How much fear is in anxiety?

1  
2 **Andreas J. Genewsky<sup>1</sup>, Nina Albrecht<sup>1</sup>, Simona A. Bura<sup>1</sup>, Paul M. Kaplick<sup>1</sup>, Daniel E.**  
3 **Heinz<sup>1</sup>, Markus Nußbaumer<sup>1</sup>, Mareen Engel<sup>1</sup>, Barbara Grünecker<sup>1</sup>, Sebastian F.**  
4 **Kaltwasser<sup>1</sup>, Caitlin J. Riebe<sup>1</sup>, Benedikt T. Bedenk<sup>1</sup>, Michael Czisch<sup>2</sup>, Carsten T.**  
5 **Wotjak<sup>1\*</sup>**

\*For correspondence:

[wotjak@psych.mpg.de](mailto:wotjak@psych.mpg.de) (CTW)

6 <sup>1,2</sup>Max Planck Institute of Psychiatry

7 **Present address:** <sup>1</sup>Department of Stress Neurobiology and Neurogenetics, Max Planck Institute of Psychiatry, 80804, Munich, Germany.; <sup>2</sup>Core Unit Neuroimaging, Max Planck Institute of Psychiatry, 80804, Munich, Germany.

8 **Abstract** The selective breeding for extreme behavior on the elevated plus-maze (EPM) resulted  
9 in two mouse lines namely high-anxiety behaving (HAB) and low-anxiety behaving (LAB) mice.  
10 Using novel behavioral tests we demonstrate that HAB animals additionally exhibit maladaptive  
11 escape behavior and defensive vocalizations, whereas LAB mice show profound deficits in escaping  
12 from approaching threats which partially results from sensory deficits. We could relate these  
13 behavioral distortions to tonic changes in brain activity within the periaqueductal gray (PAG) in HAB  
14 mice and the superior colliculus (SC) in LAB mice, using in vivo manganese-enhanced MRI (MEMRI)  
15 followed by pharmacological or chemogenetic interventions. Therefore, midbrain-tectal structures  
16 govern the expression of both anxiety-like behavior and defensive responses. Our results challenge  
17 the uncritical use of the anthropomorphic terms *anxiety* or *anxiety-like* for the description of mouse  
18 behavior, as they imply higher cognitive processes, which are not necessarily in place.

## 20 Introduction

21 The anthropomorphic terms *anxiety* or *anxiety-like* are widely used for the description of affective  
22 states in laboratory animals. The definition for anxiety (*American Psychiatric Association, 2013*)  
23 includes worries about distant or potential threats while the occurrence of exaggerated anxiety in  
24 combination with constant ruminations about illusionary threats indicates an anxiety disorder.  
25 *Fear* on the other hand describes the affective state (*'being afraid'*) which is elicited with respect to  
26 an explicit, threatening stimulus.

27 The behavioral repertoire of fear - i.e. the sum of defensive responses - results from a recruit-  
28 ment of the *defensive survival circuits* (*LeDoux, 2014*). Its functions are either increasing the distance  
29 between the subject and the threat (flight), rendering the subject invisible to the threat (freezing)  
30 or ultimately enabling the subject to fight. This includes the autonomic and neuroendocrine  
31 processes which prepare the creature for a successful flight e.g. reflected by increased heart and  
32 respiratory rate and release of stress hormones via increased hypothalamus-pituitary-adrenal-  
33 medulla (HPA) axis activity. As previously suggested, this condition is described best as the *defensive*  
34 *organismic state* (*LeDoux, 2014*). Therefore, it is just to say that the subjective feeling of being  
35 anxious or afraid are cognitive processes, while the behavioral expression of anxiety, fear and panic  
36 are physical or bodily processes which are typically orchestrated by subcortical and mesencephalic  
37 structures (*LeDoux and Pine, 2016*). In laboratory animals, like mice and rats, we lack the access to  
38 these subjective inner cognitive states, but have to solely rely on the interpretation of physiological  
39 and behavioral data.

40 A variety of behavioral testing paradigms therefore aims to assess states of *anxiety*, *fear* or *panic*  
41 based on the type and quality of evoked defensive behaviors in response to specific stimuli or  
42 contexts (*for review see Cryan and Holmes, 2005; Calhoun and Tye, 2015*). Hereby, more subtle be-

43 haviors like avoiding exposed and brightly illuminated areas on an elevated plus maze (EPM)(*Pellow*  
44 *et al., 1985*) are interpreted as *anxiety*. In contrast, the sudden jumping (a flight reaction completely  
45 different from startle response) followed by pronounced immobility (freezing) upon the onset  
46 of a previously negatively conditioned tone (auditory/Pavlovian fear conditioning; *for review see*  
47 *Maren, 2001*) is commonly associated with *fear*. These tests suggest a sharp distinction between  
48 the behavioral measures of *anxiety* and *fear*. For instance, auditory fear conditioning experiments  
49 paved the way for an in depth understanding of the amygdalar circuits underlying the expression a  
50 single characteristic defensive response (i.e., freezing) (*for review see Tovote et al., 2015*). In more  
51 complex and ethological relevant testing situations, however, one can observe a gradual transition  
52 from risk assessment to avoidance and flight or tonic immobility and ultimately fight/panic-like  
53 jumping as a function of the threat's imminence (i.e. defensive distance) and the ability to escape  
54 (*Ratner, 1967, 1975; Blanchard et al., 1986; Blanchard and Blanchard, 1990; Blanchard et al., 1990,*  
55 *1997, 2003*). This relationship was initially conceptualized as the *predatory imminence continuum*  
56 (*Fanselow and Lester, 1988*) and later has been integrated into the *two-dimensional defense system*  
57 (*McNaughton and Corr, 2004*). The two-dimensional defense system is of particular significance  
58 as it comprehensively describes the interplay of *defensive avoidance* and *defensive approach* with  
59 respect to the *defensive distance* (perceived distance to threat). In addition, it highlights the func-  
60 tional hierarchy of dominant brain structures in the orchestration of the behavioral expression  
61 of anxiety, fear and panic. In this context, McNaughton & Corr reappraise the function of the  
62 periaqueductal gray (PAG) '*in the lowest levels of control of anxiety*' (*McNaughton and Corr, 2004*) (*see*  
63 *also (McNaughton and Corr, 2018)*).

64  
65 In this line of thinking we were interested to which extent the behavioral phenotype of a mouse  
66 model for extremes in *trait anxiety* (1) is accompanied by altered levels of defensive responses,  
67 and in addition (2) can be explained by changed neuronal activity in midbrain structures. As a  
68 model organism we chose two mouse lines which were previously established from CD1 mice as  
69 the result of a selective breeding approach based on the behavior on the EPM - a classical anxiety  
70 test. Thereby hyperanxious high-anxiety behaving (HAB) and hypoanxious low-anxiety behaving  
71 (LAB) mice were generated (*Krömer et al., 2005*) which are compared to normal-anxiety behaving  
72 (NAB) mice. Besides the already mentioned *anxiety-like* phenotype on the EPM (*Krömer et al., 2005;*  
73 *Bunck et al., 2009; Erhardt et al., 2011; Avrabos et al., 2013; Yen et al., 2013; Füchsl et al., 2014*),  
74 these lines show also marked differences in other behavioral and physiological measures (*see*  
75 *Table 1*). In HAB mice, most of the behavioral measures are biased towards immobility or lack of  
76 exploratory drive. This bears the risk of false interpretations, since altered locomotor activity and/or  
77 motivation might explain the extreme phenotypes as well. In the present study we comprehensively  
78 re-characterize HAB, NAB and LAB (HNL) mice for their extreme behavioral phenotypes on the EPM.  
79 We provide evidence that in HAB animals only ethobehavioral EPM measures and the levels of  
80 autonomic arousal are sensitive to anxiolytic treatment. In addition, we demonstrate for the first  
81 time that adult HAB animals show a disposition for sonic/audible vocalizations which is decreased  
82 by the anxiolytic diazepam. Further, we show that the extremes in high or low *anxiety-like* behavior  
83 of HAB and LAB animals are accompanied by paralleled alterations active in defensive responses  
84 using two novel, multi-sensory tasks (Robocat and IndyMaze) which assay repeated, innate escape  
85 behavior towards an approaching threatening stimulus. Hereby, we demonstrate that HAB animals  
86 present maladaptively altered levels of defensive responses, while LAB animals exhibit a strongly  
87 deficient reaction towards the threatening stimulus. Using several complementary strategies to  
88 probe the visual capabilities of HNL animals (optomotor response, electroretinography, etc.), we  
89 show that LAB animals suffer from complete retinal blindness. In order to assess tonic/basal in-vivo  
90 whole-brain neuronal activity alterations in HAB and LAB animals, we employ manganese-enhanced  
91 magnetic resonance imaging (MEMRI) (*Grünecker et al., 2010; Bedenk et al., 2018*). Thereby, we  
92 provide evidence that HAB mice exhibit an increased neuronal activity within the PAG, while LAB  
93 mice show a decreased activity in the deep layers of the superior colliculus (SC). Finally, using a

94 designer receptor exclusively activated by designer drugs (DREADD) approach in LAB mice or by  
 95 applying localized injections of muscimol in HAB mice we are able to partially revert the extreme  
 96 phenotypes in *anxiety-like* behavior in LAB and HAB animals.

**Table 1.** Physiological & Behavioral Phenotypes of HAB and LAB mice

| Modality                  | Test | Measure/Param.               | HAB  | LAB  | References                                                                                                                     |
|---------------------------|------|------------------------------|------|------|--------------------------------------------------------------------------------------------------------------------------------|
| <b>Anxiety</b>            | EPM  | open-arm time                | --   | ++   | (Krömer et al., 2005; Bunck et al., 2009; Erhardt et al., 2011); (Avrabet et al., 2013; Yen et al., 2013; Füchsl et al., 2014) |
|                           | EPM  | open-arm latency             | ++   | •    | (Krömer et al., 2005)                                                                                                          |
|                           | DLB  | time in light comp.          | •    | +    | (Krömer et al., 2005)                                                                                                          |
|                           | USV  | no. of vocalizations         | ++   | --   | (Krömer et al., 2005)                                                                                                          |
|                           | IA   | step-down latency            | ++   | n.a. | (Yen et al., 2012)                                                                                                             |
| <b>Fear</b>               | TMT  | odor avoidance               | +    | •    | (Sotnikov et al., 2011)                                                                                                        |
|                           | FC   | contextual, freezing         | ++   | --   | (Sartori et al., 2011a; Yen et al., 2012)                                                                                      |
|                           | FC   | cued, freezing               | ++   | --   | (Sartori et al., 2011a; Yen et al., 2012)                                                                                      |
|                           | TM   | FC, HR during CS             | ++   | n.a. | (Gaburro et al., 2011)                                                                                                         |
|                           | TM   | FC, HRV during CS            | -    | n.a. | (Gaburro et al., 2011)                                                                                                         |
|                           | ASR  | 105-115 dB                   | -    | ++   | (Yen et al., 2012, 2013)                                                                                                       |
| <b>Locomotion</b>         | DLB  | line crossings               | --   | ++   | (Krömer et al., 2005)                                                                                                          |
|                           | DLB  | rearing                      | --   | ++   | (Krömer et al., 2005; Yen et al., 2013)                                                                                        |
|                           | HB   | rearing                      | -    | ++   | (Yen et al., 2013)                                                                                                             |
|                           | OBS  | homecage activity            | •    | +    | (Krömer et al., 2005)                                                                                                          |
|                           | TM   | homecage activity            | •    | n.a. | (Gaburro et al., 2011)                                                                                                         |
|                           | OF   | distance                     | •    | ++   | (Yen et al., 2013)                                                                                                             |
|                           | OF   | mobility time                | --   | ++   | (Yen et al., 2013)                                                                                                             |
| <b>Stress Reactivity</b>  | TMT  | CORT release                 | •    | •    | (Sotnikov et al., 2011)                                                                                                        |
|                           | FST  | CORT release                 | --   | •    | (Sotnikov et al., 2014)                                                                                                        |
|                           | DEX  | CORT release                 | --   | •    | (Sotnikov et al., 2014)                                                                                                        |
| <b>Depression</b>         | TST  | immobility                   | •/+  | --   | (Krömer et al., 2005; Bunck et al., 2009; Yen et al., 2013)                                                                    |
|                           | FST  | immobility                   | •/++ | --   | (Krömer et al., 2005; Bunck et al., 2009; Sah et al., 2012); (Sotnikov et al., 2014; Schmuckermair et al., 2013)               |
|                           | SP   | sucrose intake               | --   | n.a. | (Sah et al., 2012)                                                                                                             |
| <b>Addiction</b>          | CPP  | cocaine-induced              | +    | n.a. | (Prast et al., 2014)                                                                                                           |
| <b>Spatial Navigation</b> | WCM  | re-learning                  | •    | --   | (Yen et al., 2013)                                                                                                             |
| <b>Physiology</b>         |      | fluid intake                 | n.a. | ++   | (Kessler et al., 2007)                                                                                                         |
|                           |      | urine osmolarity             | n.a. | --   | (Kessler et al., 2007)                                                                                                         |
|                           | IHC  | GAD65/67 in amygdala         | ++   | n.a. | (Tasan et al., 2011)                                                                                                           |
|                           | VSDI | intra-amygdalar signal prop. | ++   | -    | (Avrabet et al., 2013)                                                                                                         |

ASR acoustic startle response, CS conditioned stimulus, CORT corticosterone, CPP conditioned place preference, CRH corticotropin releasing hormone, DEX dexamethasone-suppression/CRH-stimulation test, DLB dark-light box, EPM elevated plus maze, FC auditory/contextual fear conditioning, FST forced swim test, HB holeboard test, HR heart rate, HRV heart rate variability, IA inhibitory avoidance, IHC immuno-histochemistry, OBS observation or visual scoring by experienced experimenter, OF open field, SP sucrose preference test, TMT 2,5-dihydro-2,4,5-trimethylthiazoline, TM telemetry, USV ultrasonic vocalizations, VSDI voltage-sensitive dye imaging, WCM water cross-maze. -- strong decrease; - slight decrease; • no change; + slight increase; ++ strong increase; n.a. not applicable.

Note: Only those references were taken into account which directly compare HAB to NAB and LAB to NAB.

## 97 Results

### 98 Behavioral Assessment of HAB, NAB, LAB mice on the Elevated Plus Maze

99 The elevated-plus maze (EPM) is considered to be a robust assay for the detection of altered *anxiety-*  
 100 *like* behavior in mice. However, the standard test duration rarely exceeds 5-10 minutes (Komada  
 101 et al., 2008), whereby strong inter-individual differences in avoidance behavior and especially their  
 102 pharmacological modulation, are masked due to stringent cut-off criteria. In order to overcome  
 103 this issue, we have extended the testing duration to 30 minutes and re-evaluated the behavior of  
 104 HAB (N=11), NAB (N=7) and LAB (N=7) mice on the EPM, while focusing on the initial 5 minutes for  
 105 all parameters, except for latency (0-30 min) and stretch-attend postures (0-15 min), to provide  
 106 measures which are largely comparable to previous studies (see Fig 1A). Analysis of data obtained  
 107 during the entire observation period revealed essentially the same findings (not shown).

108 Using this approach, significant group differences ( $F_{2,22}=15.07$ ,  $p<0.0001$ ) in the latencies to  
 109 explore the open arms were revealed (Fig 1A). More than 45% of all HAB animals did not enter  
 110 the open arm, even within the extended testing duration of 30 minutes compared to 0% in NAB

111 mice ( $\chi^2=4.41$ ,  $p=0.0358$ ). On the contrary all LAB animals explored the open arm with latencies  
112 < 6 minutes. These distinct behavioral traits were also reflected by the percentage of time the  
113 animals spent on the open arm: LAB animals  $53.6\pm 11.3\%$  compared to  $2.4\pm 0.8\%$  NAB ( $F_{2,22}=26.25$ ,  
114  $p<0.0001$ ). Additionally, LAB animals showed an overall increase in locomotor activity ( $1400.0\pm 171.7$   
115 cm vs.  $723.0\pm 60.8$  cm,  $F_{2,22}=22.49$ ,  $p<0.0001$ ). On the contrary, HAB animals spent more than 85%  
116 of the time in the closed arm ( $F_{2,22}=28.98$ ,  $p<0.0001$ ), as they also avoided staying in the central  
117 zone ( $13.0\pm 2.3\%$  vs.  $33.8\pm 4.0\%$ ,  $F_{2,22}=12.96$ ,  $p=0.002$ ). These observations are consistent with  
118 previous reports of HAB, NAB and LAB behavior on the EPM (*Krömer et al., 2005; Bunck et al.,*  
119 *2009; Erhardt et al., 2011; Avrabos et al., 2013; Yen et al., 2013; Füchsl et al., 2014*). The rather low  
120 open-arm time shown by NAB mice may relate to the specific test conditions (we placed the EPM in  
121 middle of a large, dimly lit room without additional surrounding enclosures). To complement the  
122 traditional EPM parameters, the display of stretched-attend postures (SAP) (*Grant and Mackintosh,*  
123 *1963*), a form of active risk assessment behavior, was analyzed as an ethobehavioral measure  
124 (Fig 1B). It was previously shown that the number of SAPs decreases upon anxiolytic treatment  
125 (*Kaesermann, 1986*) and increases with the anxiogenic 5-HT<sub>2C/1B</sub> receptor antagonist mCPP (*Grewal*  
126 *et al., 1997*). Moreover, the display of SAPs depend on the presence of an imminent threat or a  
127 potential threatening situation and demonstrate the general motivation of the animals to explore  
128 a potentially threatening environment (*Pinel et al., 1989*). LAB ( $N=6$ , one animal was excluded as  
129 no SAPs were displayed) animals showed a significantly lower number of SAPs (Fig 1B;  $F_{2,19}=29.84$ ,  
130  $p<0.0001$ ; LAB  $20.7\pm 5.9$  vs. NAB  $63.0\pm 4.3$ ), whereas HAB animals were indistinguishable from NAB  
131 (Fig 1B;  $N=5$ , two animal were excluded as no SAPs were displayed). Looking at the overall duration  
132 of displayed SAPs, HAB animals showed increased measures (HAB  $222.4\pm 16.8$  s vs. NAB  $158.0\pm 15.2$   
133 s), whereas LAB animals spent on average only  $33.7\pm 12.3$  seconds displaying SAPs ( $F_{2,19}=32.74$ ,  
134  $p<0.0001$ ). If analyzed in 5 min bins, NAB animals could adapt to the EPM and the duration of  
135 displayed SAPs decayed. On the contrary, HAB animals showed an elevated non-decaying response  
136 after 15 minutes (group $\times$ time interaction:  $F_{2,28}=3.587$ ,  $p=0.0410$ ; 2-way rmANOVA) and higher  
137 autonomic arousal, which was reflected by significantly increased defecation (*Hall, 1934*) during the  
138 EPM task (Fig 1C;  $11.6\pm 1.2$  vs.  $7.7\pm 0.7$ ,  $F_{2,21}=4.779$ ,  $p<0.0195$ ).

139

140 Before the animals were placed on the EPM, every subject was tested for the disposition to  
141 emit sonic vocalizations by lifting them 3 times from grid cage top (*Whitney, 1970*). Animals which  
142 vocalized at least once, were counted as ‘vocalizers’. Whereas none of the NAB ( $N=13$ ) or LAB  
143 ( $N=15$ ) animals emitted even a single call, 47% of HAB ( $N=15$ ) animals vocalized at least once (Fig 1D;  
144  $\chi^2=15.61$ ,  $p=0.0004$ ).

145  
146 In order to investigate to which extent the phenotype of HAB mice can be modulated with  
147 traditional anxiolytics, we injected diazepam (DZP, 1 mg/kg i.p.) or vehicle (saline) to separate  
148 groups of experimentally naive HAB mice ( $N=13$ , each). None of the classical EPM parameters  
149 were sensitive to DZP treatment, except for an increase in locomotor activity (Fig 1E;  $t_{24}=2.174$ ,  
150  $p=0.0398$ ). Neither the total number nor the total duration of SAPs were significantly altered by  
151 DZP (Fig 1F). However, analysis in 5-min bins revealed that DZP turned the non-decaying display  
152 of SAPs shown by vehicle-treated HAB into a decaying trajectory (treatment $\times$ time: interaction:  
153  $F_{2,28}=3.587$ ,  $p=0.0410$ ; 2-way rmANOVA) which resembles the situation in NAB mice. In addition,  
154 DZP treatment decreased defecation (Fig 1G;  $1.5\pm 0.5$  vs.  $5.8\pm 1.2$ ,  $t_{24}=3.344$ ,  $p=0.0027$ ) and the  
155 disposition to vocalize during a 5 minute tail-suspension test (TST) (Fig 1H; 3 out of 13 vs. 9 out of 13,  
156 two-sided Fisher’s exact test  $p=0.0472$ ). The higher absolute incidence of vocalizers, compared to  
157 the data shown in Fig 1D, is most likely due to prior injection stress. The lower absolute defecation  
158 scores, in turn, might be partially ascribed to defecation during the injection procedure. Taken  
159 together, HAB, NAB and LAB animals show a robust behavioral phenotype on the EPM. Further,  
160 under our experimental conditions, the traditional EPM measures are not sensitive to diazepam-  
161 treatment, but more ethologically relevant measures like autonomic arousal, vocalization and active  
162 risk assessment.

## 163 **Two Novel Ethologically Inspired Testing Situations Reveals Extremes in Innate De-** 164 **fensive Responses in HAB and LAB Mice**

165 The behavioral measures obtained on the EPM are indicative of an approach-avoidance situation  
166 which became manifest differently in HAB and LAB mice. The term *anxiety* test for the EPM infers  
167 an inner conflict which misleadingly points towards higher cognitive processes, mediated for  
168 example by the prefrontal areas. Looking at avoidance behavior separately, it becomes obvious that  
169 there is a strong subcortical component which is in a continuum to flight and *panic-like* reactions,  
170 involving most likely the amygdala, ventromedial hypothalamus, periaqueductal gray and the  
171 superior colliculus (*McNaughton and Corr, 2018*). Therefore we were interested if the altered EPM  
172 phenotype of HAB and LAB is accompanied by changes in defensive responses as it has been  
173 suggested previously to be the case with conditioned fear (*Sartori et al., 2011b; Yen et al., 2012*). In  
174 order to circumvent learning mediated effects, we focused on innate defensive responses upon  
175 acute confrontation with a (potential) threat.

176 Paradigms which assess general innate *fear* levels should incorporate multi-sensory stimuli  
177 and allow for repeated testing and temporally confined exposure. In lack of appropriate testing  
178 situations, we have developed two novel paradigms: the Robocat (*see* ), which is based on a  
179 previously published design by *Choi and Kim (2010)*, and the IndyMaze, which is inspired by a  
180 popular movie (*Spielberg and Marshall, 1981*) (For a detailed description of both tests *see* section  
181 *Methods and Materials*). The different behavioral readouts obtained in the Robocat task are depicted  
182 in Fig 2A. The mouse could either activate the Robocat and subsequently display a flight response,  
183 activate the Robocat but simply bypassing it or activate the Robocat and collide with it. The innate  
184 defensive responses of HAB ( $N=7$ ), NAB ( $N=6$ ) and LAB ( $N=9$ ) mice were assessed using the Robocat  
185 task. Fig 2B depicts the percentage of animals which displayed the respective behaviors at least  
186 once during a 10 minute exposure to the Robocat. During this trial the animals activated the  
187 Robocat several times (HAB  $2.4\pm 0.4$ , NAB  $3.5\pm 0.6$ , LAB  $10.8\pm 2.1$ ). HAB animals were not able to  
188 adapt to the Robocat’s activation and showed a flight response at all encounters (Fisher’s exact  
189  $p=0.021$ ), they never bypassed (Fisher’s exact  $p=0.0047$ ) nor collided with it. On the contrary NAB

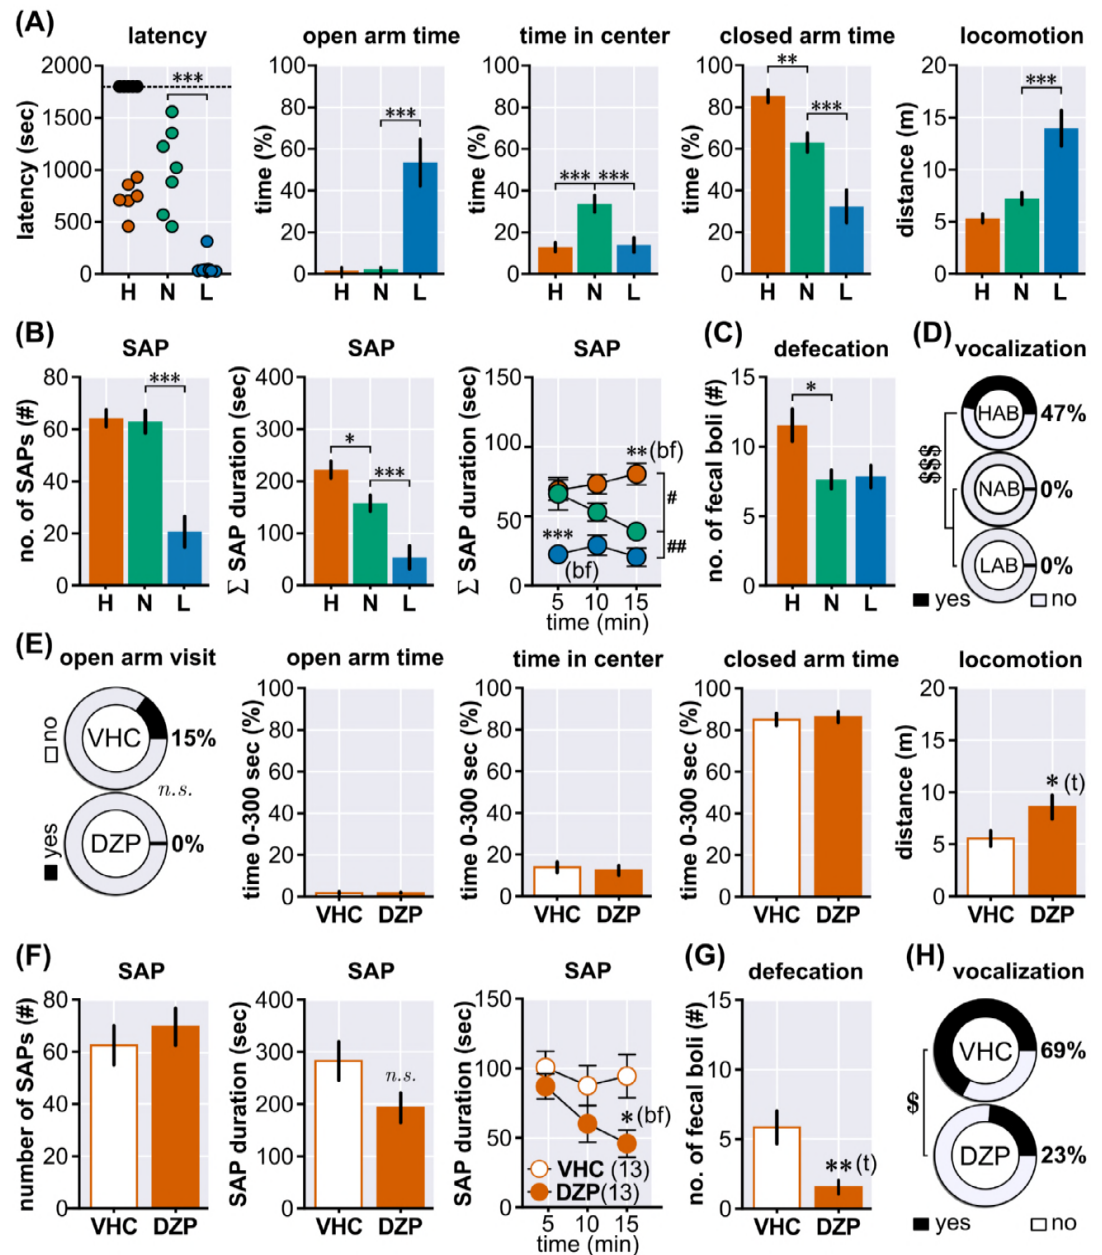

**Figure 1. Behavioral Assessment of HAB, NAB, LAB Mice on the EPM**

(A) Using the standard EPM but with an extended cut-off time of 30 min the following behavioral parameters were assessed for HAB ( $N=11$ ), NAB ( $N=7$ ) and LAB ( $N=7$ ) animals: the latency to enter the open arm, open-arm time (first 5 minutes; 0-5 min), central zone time (0-5 min), closed arm time (0-5 min) and the distance the animals have traveled (0-5 min). (B) In addition to the classical EPM parameters we have also investigated the display of stretched-attend postures (SAP) which serves as a measure of active risk assessment: the total number of SAPs during the first 15 min of the task, the total duration of SAPs during the first 15 min, and the duration of SAPs in 5 minute bins. (C) Defecation during EPM exposure (number of fecal boli) as an indirect measure of autonomic arousal. (D) Disposition to emit sonic/audible vocalizations. (E) A new cohort of experimentally naive HAB mice was treated with diazepam (1 mg/kg, i.p.;  $N=13$ ) or vehicle (saline,  $N=13$ ) before exposure to the EPM. (F) Stretched-attend posture display of HAB animals during EPM with diazepam/vehicle treatment. (G) Defecation of HAB mice. (H) In order to assess the disposition to vocalize in standardized manner, the diazepam/vehicle treated HAB animals were subjected to a 5 min tail-suspension test, while audio signal were recorded and scored offline. Asterisks indicate significance values obtained by  $t$ -tests (t) or 1-way ANOVA followed by Newman-Keuls Multiple Comparison/Bonferroni post-hoc (bf) tests, \*  $p<0.05$ , \*\*  $p<0.01$ , \*\*\*  $p<0.001$ ; dollar signs indicate significance values obtained by  $\chi^2$  tests, \$  $p<0.05$ , \$\$\$  $p<0.001$ ; hashes indicate group effects obtained by 2-way ANOVA, ##  $p<0.01$ . Values are given as mean $\pm$ SEM.

190 animals, displayed a well-balanced behavioral profile: the minority of all animals fled the Robocat  
 191 (33%) or got hit by the it (17%), while 83% of all NAB mice tolerated and bypassed the threatening  
 192 stimulus at least once. This is contrasted by the behavior of LAB mice: no single animal fled upon  
 193 the Robocat's movement, but all bypassed it. Most strikingly however, the vast majority of LAB mice

194 89% even collided with it at least once (Fisher's exact  $p=0.011$ ).  
195 The Robocat task revealed differential defensive responses between HAB and NAB, whereby the  
196 inability of HAB mice to bypass the Robocat can be interpreted as maladaptive behavior. At the  
197 same time the high degree of controllability (allowing a bypass or withdrawal from the arena to  
198 avoid activation/confrontation) does not allow to ask whether NAB and LAB show different levels of  
199 defensive responses: the inability to express defensive responses, and a high degree of adaptation  
200 would result both in a decreased level of observable defensive reactions. In order to avoid this  
201 confounding variable we have developed the IndyMaze. In this test an animal is confronted with a  
202 rolling (25 cm/s) styrofoam ball (100 g) in a tilted ( $<1^\circ$ ) and narrow tunnel. Therefore, every trial  
203 involves a direct encounter with the threatening stimulus. The operational procedure is depicted in  
204 Fig 2C. First, the animals are free to enter the arena, which gives the latency to first exit, a measure  
205 comparable to other emergence tasks (Fig 2D). This measure corresponds to the exit latency on  
206 the EPM. HAB animals showed high latencies to exit the home compartment (HAB  $977.4 \pm 79.2$  s vs.  
207 NAB  $392.1 \pm 66.1$  s) whereas LAB animals were not different from NAB ( $F_{2,50}=12.64$ ,  $p<0.0001$ ). A  
208 significant amount of HAB animals never left the home compartment (Fig 2E) within 30 minutes  
209 ( $\chi^2_{2,N=62}=6.671$ ,  $p=0.0356$ ). Once the animals have left the home compartment, they explored the  
210 entire arena (Fig 2F) with equally low latency (HAB  $68.8 \pm 10.1$  s; NAB  $213.1 \pm 72.8$  s; LAB  $100.4 \pm 18.2$   
211 s). This demonstrates comparable levels of exploratory drive in all three lines and precludes that  
212 the increased latency to the 1<sup>st</sup> exit simply results from a lack of motivation or impaired locomotor  
213 behavior. Looking at the defensive responses (Fig 2G), which included preemptive flight responses  
214 or a retrieval after the ball has hit the animals, it is evident that both HAB and NAB are able to  
215 respond appropriately towards approaching threatening stimuli, whereas 60% of LAB animals  
216 exhibited significant deficits and failed to generate at least one defensive reaction ( $\chi^2_{1,N=27}=13.11$ ,  
217  $p=0.0014$ ). In order to test whether the behavioral readouts obtained using the IndyMaze can be  
218 modulated with anxiolytics, another cohort of HAB animals was treated with diazepam (DZP, 1  
219 mg/kg,  $N=13$ ) or vehicle (VHC, saline,  $N=12$ ) and were subjected to the IndyMaze task. The DZP  
220 treatment could significantly decrease the latency to 1<sup>st</sup> exit (Fig 2H; VHC  $1011.0 \pm 153.4$  s vs. DZP  
221  $595.5 \pm 133.5$  s; Mann-Whitney, two-tailed,  $U_{n1=208, n2=117}=39.00$ ,  $p<0.0363$ ), indicative of an anxiolytic  
222 effect, while leaving latency for end-exploration unaffected (*see*). However, DZP treatment was  
223 ineffective in modulating defensive responses (defensive responsivity: VHC 100%, DZP 100%). NAB  
224 and HAB, but not LAB, mice showed short-term avoidance of additional encounters with the ball, as  
225 indicated by the increase in latency until re-entering the middle part of the arena. One week later,  
226 both HAB and NAB mice showed a highly significant decrease in latency to 1st entry compared  
227 to the first exposure. Nevertheless, only NAB mice showed long-term avoidance of the middle  
228 segment of the arena, which is indicative of maladaptive consequences of heightened fear/ anxiety  
229 for the development of avoidance behavior (data not shown).

230 In summary, both tasks, the Robocat and IndyMaze, have proven to be valid tools to assay innate  
231 defensive responses in mice. In addition, the IndyMaze task permits also the parallel assessment  
232 of inhibitory avoidance behavior. Using both tasks, we could demonstrate that HAB mice show  
233 maladaptive levels of defensive responses. LAB animals, in contrast, exhibited strong deficits to  
234 escape imminent threats.

### 235 **Complete Retinal Blindness in LAB Mice**

236 The remarkable ignorance of LAB mice to approaching objects forced us to look for differences  
237 in visual perception. A standard test for visual acuity in mice is the assessment of the optomotor  
238 response (OMR) (*Thaung et al., 2002; Abdeljalil et al., 2005*). This test is based on the tracking  
239 behavior of mice in response to horizontally moving stripes. For this test, mice are placed on a fixed  
240 platform within a rotating cylinder lined with stripes of different width to probe visual acuity (Fig 3A  
241 *inset*). We modified this testing procedure in order to fit to all five mouse lines (B6, CD1, HAB, NAB  
242 and LAB) in a way that we have used only one, relatively large grating (0.5 cycles/degree) and in  
243 addition scored every head movement if it was concordant with the cylinders rotational direction.

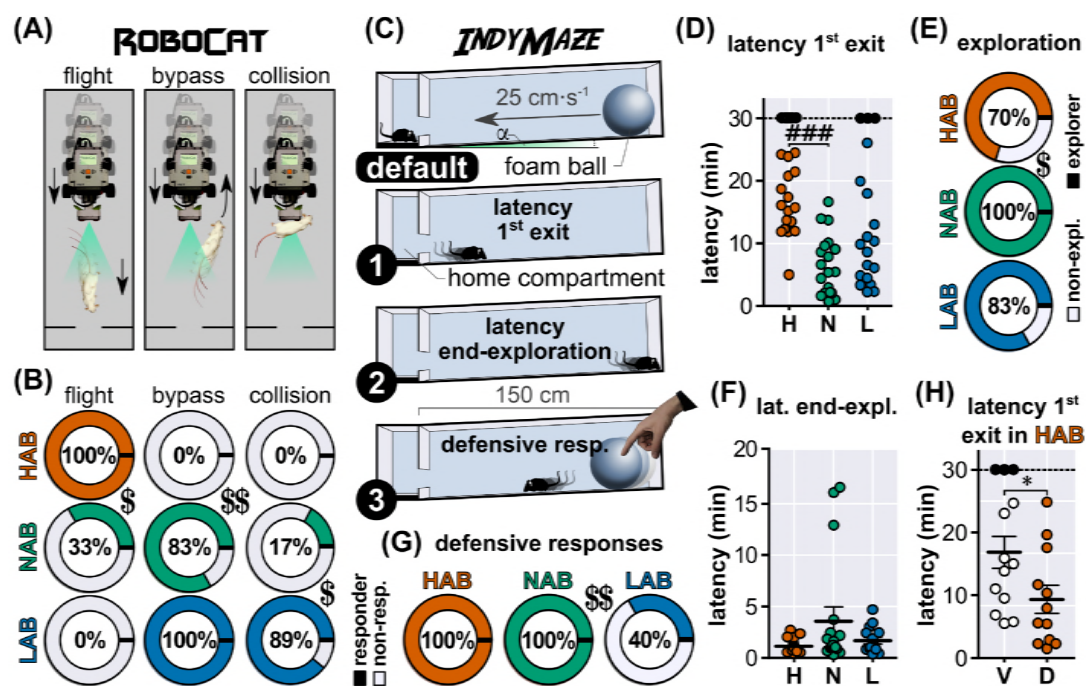

**Figure 2. Two Novel Ethologically Inspired Testing Situations Reveals Extremes in Innate Defensive Responses in HAB and LAB Mice**

**A)** The three different behavioral measures obtained in the Robocat task, whose appearance have been scored: flight, bypass and collision. **(B)** Using the Robocat, we have investigated the fear responses of HAB ( $N=7$ , red), NAB ( $N=6$ , green) and LAB ( $N=9$ , blue) animals (analyzed using Fisher's exact tests). Values are percentages of animals which showed the respective behavior at least once. **(C)** Schematic description of the IndyMaze (default) operational procedure as well as the different behavioral measures (latency to 1<sup>st</sup> exit I, latency for end-exploration II and flight response III). Using the IndyMaze we have tested different cohorts of HAB ( $N=24$ ), NAB ( $N=19$ ) and LAB ( $N=20$ ) animals. **(D)** Quantification of the latency to 1<sup>st</sup>; black-filled circles indicate animals which did not leave the start arm, HAB ( $N=7$ ), NAB ( $N=0$ ) and LAB ( $N=4$ ), those animals were excluded from the 1-way ANOVA. **(E)** Quantification of the number of animals which explored the arena. **(F)** Quantification of the latency for end-exploration excluding animals which did not enter the arena at all, as shown in *D*. Note: If the animals left the start compartment, they all explored the arena to its end with comparable vigor. **(G)** Quantification of the occurrence of fear responses at least once during 3 encounters of the approaching styrofoam ball (this includes preemptive fear responses, as well as fear responses after the ball had hit the animal). **(H)** Another cohort of HAB animals was treated with diazepam (DZP, 1 mg/kg, i.p.) ( $N=13$ ) or vehicle (VHC, saline,  $N=12$ ) and subjected to the IndyMaze, and the latency to 1<sup>st</sup> exit was quantified. Asterisks indicate significance values obtained by Mann-Whitney test, \* =  $p < 0.05$ ; dollar signs indicate significance values obtained by  $\chi^2$  or Fisher's exact tests, \$  $p < 0.05$ , \$\$  $p < 0.01$ , \$\$\$  $p < 0.001$ ; hashes indicate significance values obtained by 1-way ANOVA followed by Newman-Keuls Multiple Comparison test, ###  $p < 0.001$ . Values are given as mean  $\pm$  SEM.

244 Therefore we have used this test to assess vision in general, rather than visual acuity. Using this  
 245 approach, we could observe significant strain differences (Fig 3A;  $F_{4,54}=93.13$ ,  $p < 0.0001$ ). B6 mice  
 246 outperformed all other strains by far (B6  $16.9 \pm 0.9$  OMR/min), whereas among the albino animals  
 247 HAB animals showed the strongest responses ( $5.5 \pm 0.8$  OMR/min). Both, CD1 ( $2.6 \pm 0.7$  OMR/min)  
 248 and NAB ( $2.4 \pm 0.5$  OMR/min) animals responded similar, but LAB animals failed to show any clear  
 249 optomotor responses ( $0.2 \pm 0.1$  OMR/min).

250 As LAB mice also have been reported to exhibit certain phenomenological similarities to ADHD  
 251 (Yen *et al.*, 2013), we cannot exclude the possibility that these animals perceive but are unable  
 252 to attend to the visual stimuli and thus fail to show an appropriate response. Therefore, the  
 253 retinal function of all five mouse strains was investigated using flash electroretinography (fERG)  
 254 measurements in the anesthetized animal. The fERG setup (depicted in Fig 3B top) consisted of  
 255 a differential amplifier usually used for in-vivo extracellular neural recordings (Siegle *et al.*, 2017),  
 256 whereby the reference electrode was placed on the shaded eye. The other eye was stimulated  
 257 with a custom built miniature eyecup, equipped with a white LED, in combination with a custom  
 258 built LED driver. This setup allowed the reliable detection of electroretinographic signals and  
 259 the dissection of the b-wave component of fERG (Fig 3B bottom). The fERGs acquired in scotopic  
 260 (dark-adapted for >3h) as well under photopic conditions at three different light flash intensities  
 261 ( $0.23$ ,  $128$  and  $1.69$  log photoisomerizations  $\times$  rod $^{-1}$   $\times$  s $^{-1}$ ), showed strong deflections for B6, CD1,  
 262 HAB and NAB ( $N=6$ , each) animals (Fig 3C). However, in LAB animals ( $N=6$ ) there was no detectable



263 electrophysiological response (scotopic: Group  $F_{4,25}=14.38$ ,  $p<0.0001$ , Fig 3D; photopic: Group  
 264  $F_{4,25}=8.77$ ,  $p=0.0001$ , 2-way rmANOVA; Fig 3E). To further determine the cause for the absence  
 265 of electroretinographic responses, a histological analysis of retinal sections of all strains ( $N=3$ ,  
 266 each, right eye) was conducted and an absence of the outer nuclear layer (ONL) and the subjacent  
 267 inner/outer segments (IS/OS) was observed in LAB animals (Fig 3F). As the founder strain for LAB  
 268 animals (CD1) is known to exhibit incidences of a recessive *rd1* retinal degeneration (*Serfilippi*  
 269 *et al.*, 2004), we employed a polymerase chain reaction (PCR) genotyping screening for all strains  
 270 ( $N=4$ , each, tail biopsy) (*Chang et al.*, 2013). The test (Fig 3G) revealed that LAB animals exhibit  
 271 a homozygous mutation in the *Pde6b*<sup>rd1+/+</sup> allele which is indicative of the retinal degeneration 1  
 272 mutation which leads to blindness shortly after birth. Therefore, it is to conclude that LAB animals  
 273 (tested at an age of 3-6 month of age) suffer from complete retinal blindness, which is the reason  
 274 for the inability to escape approaching threatening stimuli, like the Robocat (Fig 2B). But blindness  
 275 does not explain why still only 40% of LAB animals showed a flight response even after hit by the  
 276 ball in the IndyMaze task (Fig 2G).

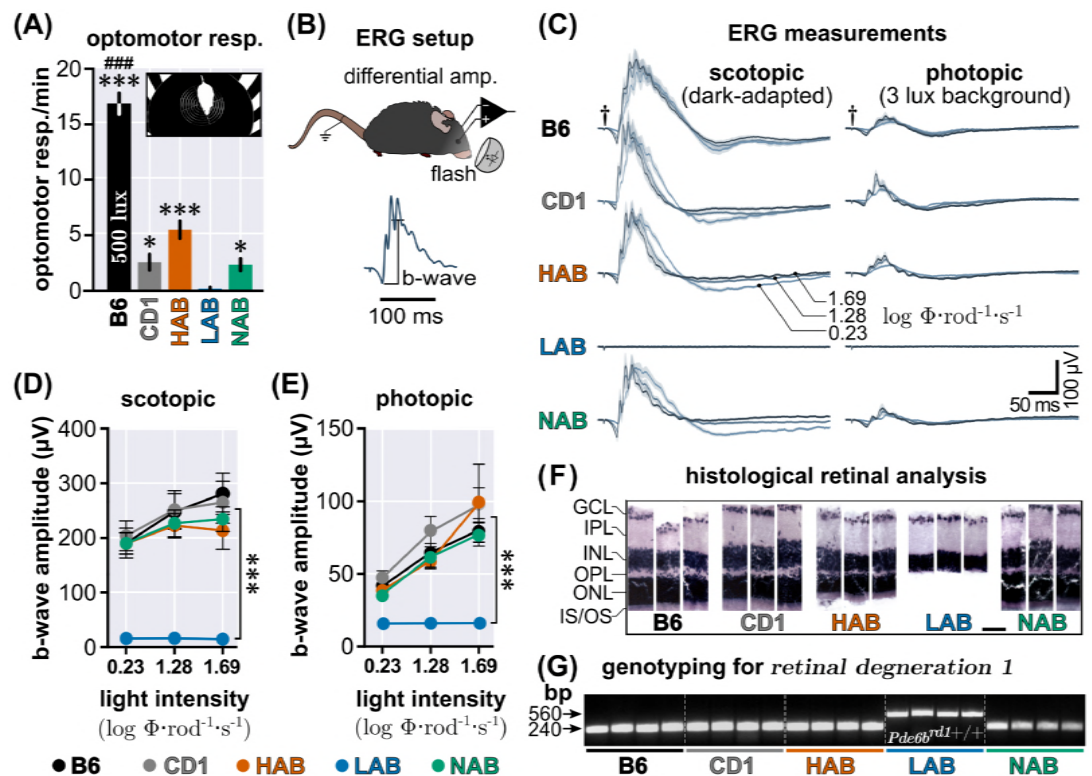

**Figure 3. Complete Retinal Blindness in LAB Mice**

(A) Optomotor responses (OMR) measured in B6, CD1, HAB, NAB, LAB ( $N=12$ , each) under 500 lux. Inset shows a HAB animal within the OMR setup. Significance values obtained by 1-way ANOVA followed by Newman Keuls Multiple Comparison are indicated by asterisks compared to LAB or by hashes for B6 compared to all other mouse lines. (B) Simplified overview of the setup for measuring electroretinography in the anesthetized mouse. The b-wave is typically associated with the activity of Müller and ON bipolar cells. (C) Electroretinograms of B6, CD1, HAB, NAB, LAB ( $N=6$ , each) measured at scotopic and photopic conditions a three different flash intensities. Quantification of (D) scotopic ERG and (E) photopic measurements. Asterisks indicate significant group effect obtained by 2-way ANOVA followed by Bonferroni post hoc test. (F) Histological analysis of 30  $\mu\text{m}$  retinal sections of B6, CD1, HAB, NAB, LAB ( $N=3$ , each, right eye only) stained with haematoxylin and eosin. IS/OS inner/outer photoreceptor segments; ONL outer nuclear layer; OPL outer plexiform layer; INL inner nuclear layer; IPL inner plexiform layer; GCL ganglion cell layer. (G) Polymerase chain reaction (PCR) screening for *Pde6b*<sup>rd1+/+</sup> allele, *retinal degeneration 1*; bp base pair. Significance values are indicated by asterisks and hashes (details for the statistical tests are given in the respective part of the figure legend): \*  $p<0.05$ , \*\*  $p<0.01$ , \*\*\*  $p<0.001$  vs. LAB; ###  $p<0.001$  vs. CD1, HAB, LAB and NAB. Values are given as mean  $\pm$  SEM.

## 277 Reversing the Low-anxiety Phenotype of LAB Mice

278 The severe deficit in avoiding approaching threats of LAB mice during the Robocat task is explained  
 279 by their retinal degeneration. However, using the IndyMaze, where retrievals (after the ball had hit  
 280 the animal) were also counted as fear responses, it became obvious that LAB mice also showed a

281 decreased responsivity towards tactile stimuli. Therefore, it was necessary to determine whether  
282 this behavioral abnormality can be ascribed to differential activity in a certain brain area. In order  
283 to investigate the tonic neuronal activity changes in LAB mice compared to NAB, we employed  
284 manganese-enhanced magnetic resonance imaging (MEMRI) in HAB ( $N=31$ ), NAB ( $N=26$ ) and LAB  
285 ( $N=30$ ) mice (FDR  $p<0.001$ , cluster extent  $>20$ ), using a 3-level full-factorial design voxel-wise analysis  
286 (for the complete MEMRI data set *see* ). The results obtained by pairwise comparison of MEMRI  
287 data (i.e., HAB vs. NAB, LAB vs. NAB) suggested, among others, a decreased accumulation of  
288 manganese within the ventral parts of the deep and intermediate layers of the superior colliculus  
289 (lateral to the periaqueductal gray) in LAB mice (Fig 4A). This structure receives dense inputs from  
290 the primary and secondary somatomotor areas (Allen Brain Atlas, Connectivity, exps. #180719293,  
291 #180709942). In order to assess the functional relationship of this brain region in the generation  
292 of the LAB behavioral phenotype, the recently developed DREADD approach (*Armbruster et al.,*  
293 **2007**) was employed. The activating DREADD hM3Dq fused to the reporter protein mCherry was  
294 expressed under the control of the CaMKII $\alpha$  promoter using adeno-associated viral vectors (AAV5-  
295 CaMKII $\alpha$ -hM3Dq-mCherry,  $N=11$ ) or the control virus (AAV5-CaMKII $\alpha$ -mCherry,  $N=12$ ) within the SC  
296 (ML  $\pm 0.9$  mm, AP -3.64 mm, DV -1.75 mm). An exemplary image of the virus expression is shown in  
297 Fig 4B. This approach resulted in the labeling of the entire SC (for detailed histological verification  
298 *see* A). After an incubation period of  $>5$  weeks, all animals were subjected to the IndyMaze. On the  
299 testing day each animal was injected (i.p.) with 1 mg/kg CNO 45 minutes before the trial (as both,  
300 experimental and control animals, received the same amount of CNO, the previously discovered  
301 side-effects of converted clozapine (*Gomez et al., 2017*) cannot explain the behavioral changes).  
302 Experimental animals expressing hM3Dq showed a significantly (Mann-Whitney  $U_{n_1=94, n_2=182}=16.00$ ,  
303  $p=0.0023$ ) increased latency to leave the start compartment ( $1282.0\pm 185.4$  s vs.  $265.5\pm 113.6$   
304 s; Fig 4C). Moreover only 64% of hM3Dq animals left the start compartment (Fig 4D) within 30  
305 minutes (Fisher's exact,  $p=0.0373$ ). Also the latency for end exploration was increased ( $216.0\pm 62.7$  s  
306 vs.  $51.0\pm 25.3$  s; Mann-Whitney  $U$  test;  $U_{n_1=86, n_2=104}=8.00$ ,  $p=0.0046$ ; Fig 4E). The fear responsivity  
307 (Fig 4F) was increased to 71% of mice transfected with hM3Dq, compared to 9% in mCherry  
308 controls (Fisher's exact,  $p=0.0095$ ). Next, we tested whether this pharmacogenetically augmented  
309 defensive response pattern, is also reflected by changed behavior on the EPM (one week after  
310 IndyMaze task, CNO injection 45 min prior to experiment; Fig 4G). Similar to the emergence  
311 component of the IndyMaze, hM3Dq animals treated with 1 mg/kg CNO showed an increased  
312 ( $85.6\pm 12.9$  s vs.  $27.4\pm 2.4$  s) latency to access the open arm ( $U_{n_1=69.5, n_2=183.5}=3.500$ ,  $p=0.0002$ ). This  
313 was accompanied by a decreased percentage of time spent on the open arms ( $61.9\pm 4.2$  % vs.  
314  $76.0\pm 3.3$  %,  $U_{n_1=183, n_2=93}=27.00$ ,  $p=0.0178$ ), an increased percentage of time spent in the closed  
315 arms ( $33.6\pm 4.3$  % vs.  $18.3\pm 3.0$  %,  $U_{n_1=100.5, n_2=175.5}=22.50$ ,  $p=0.0081$ ) as well as decreased locomotor  
316 activity ( $7.1\pm 0.7$  m vs.  $9.7\pm 1.0$  m,  $U_{n_1=179, n_2=97}=31.00$ ,  $p=0.0337$ ). Time in center was unaffected  
317 (*see* B). The partially reverted behavioral phenotype of LAB mice on the EPM could be explained  
318 by an increased passivity due to nonspecific effects of the active DREADD. However, the increased  
319 number of active risk assessment behavior (Fig 4H) in hM3Dq animals ( $13.0\pm 1.4$  vs.  $4.0\pm 0.7$ ) points  
320 towards higher levels of defensive responses ( $U_{n_1=56.5, n_2=174.5}=1.5$ ,  $p=0.0002$ ). In addition, also the  
321 duration of SAPs was increased ( $8.9\pm 2.4$  s vs.  $2.0\pm 0.6$  s) within the first 5 minutes of the EPM  
322 (hM3Dq $\times$ time:  $F_{2,38}=3.59$ ,  $p=0.0375$ , 2-way rmANOVA). Together, these results show that elevation  
323 of neuronal activity within the SC increased open-arm avoidance and risk assessment behavior  
324 even in blind LAB animals. Moreover, the pharmacogenetic stimulation of the SC could restore in  
325 part, the deficits in defensive responses to tactile stimuli.

### 326 **Reversing the High-anxiety Phenotype of HAB Mice**

327 Similar to LAB mice, we used the MEMRI approach to identify the neural circuitry which potentially  
328 underlies the maladaptive defensive response pattern and increased open-arm avoidance behavior  
329 in HAB mice. A prominent brain structure found to exhibit increased manganese accumulation,  
330 was the ventrolateral, lateral (l) and dorsolateral (dl) periaqueductal gray (Fig 5A; for the complete

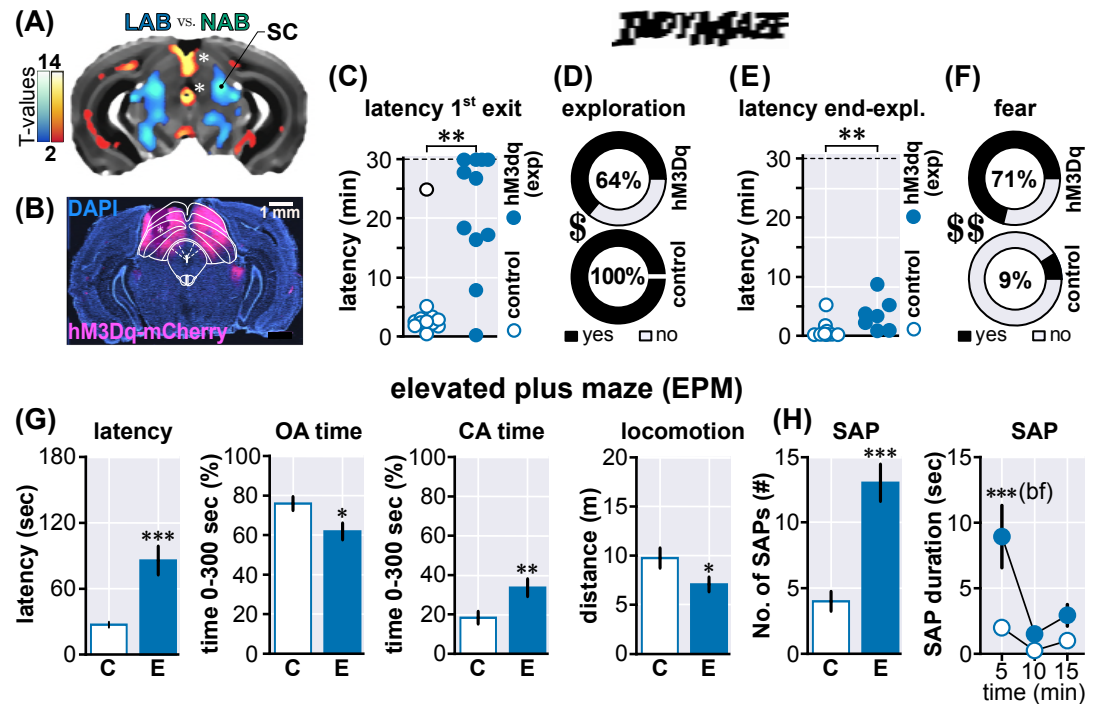

**Figure 4. Reversing the Low-anxiety Phenotype of LAB Mice**

**(A)** Manganese enhanced MRI (MEMRI) of LAB ( $N=30$ ) vs. NAB ( $N=26$ ) animals exhibited a significantly decreased accumulation of  $Mn^{2+}$  within the deep and intermediate layers of the superior colliculus of LAB. Warm colors indicate increased accumulation, cold colors indicate decreased accumulation in LAB as compared with NAB. The color brightness indicates the significance values. Asterisks mark signal artifacts within the aqueduct and above the superior colliculus due to line differences in brain templates. **(B)** Exemplary brain section at approximately the same slice location as the MEMRI data, depicting extent of viral expression (magenta) at the level of the superior colliculus. Shown in cyan is the nuclear 4',6-diamidino-2-phenylindole (DAPI) counterstain. Overlaid are the outlines of the SC and PAG. Asterisk marks tissue lesion which occurred during sectioning. The effect of hM3Dq activation within the SC was studied using the IndyMaze task. Shown is the latency to first exit **(C)**, the percentage of animals which explored the arena at all **(D)**, latency to end-exploration **(E)** and the percentage of animals which showed a fear response to the ball **(F)**. All animals were treated with 1 mg/kg clozapine-*N*-oxide (CNO) 45 minutes before the test. **(G)** In addition the same animals were tested for the behavior on the EPM (30 minutes), and latency to emerge, open arm (OA) time, closed-arm (CA) time and locomotion was assessed within the first 5 minutes. **(H)** Moreover the active risk assessment parameters, i.e. the total number of stretched-attend postures (SAP) and the duration of SAPs over time (0-15 min) were scored. Asterisks indicate significance values obtained by Mann-Whitney test if not stated otherwise, \*  $p < 0.05$ , \*\*  $p < 0.01$ , \*\*\*  $p < 0.001$ ; dollar signs indicate significance values obtained by Fisher's exact tests, \$  $p < 0.05$ , \$\$  $p < 0.01$ . Significance values obtained by 2-way rmANOVA, followed by Bonferroni post-hoc test are indicated with *bf*. Values are given as mean  $\pm$  SEM.

MEMRI data set see ). In order to assess the functional relationship of the PAG in the generation of the HAB behavioral phenotype, we implanted guide cannulae targeting the dl/IPAG (ML  $\pm 0.6$  mm, AP -4.25 mm, DV -2.45 mm, needle protruded 500  $\mu$ m) and injected 53.24 ng/100 nl (per hemisphere) of fluorescently labeled muscimol (MUSC), a potent GABA<sub>A</sub>-agonist (45 minutes before each experiment) which is comparable to 10 ng in 100 nl of ordinary muscimol. An exemplary image depicting the muscimol diffusion is shown in Fig 5B. The extent of muscimol diffusion of all animals ( $N=11$ ) is shown in A) and comprised besides the IPAG, the dlPAG and partly the deep and intermediate layers of the SC. In order to test whether increased GABAergic signaling within the IPAG changes the extreme open-arm avoidance behavior of HAB mice, we have tested vehicle (aCSF,  $N=6$ ) or MUSC ( $N=5$ ) treated HAB mice (one VHC and two MUSC animals have been excluded from analysis due to deficient infusion) for their behavior on the EPM (Fig 5C-H). While only 20% of VHC treated animals accessed the open arm, all MUSC animals readily did so (Fisher's exact,  $p=0.0152$ ; Fig 5C+D). Further, MUSC treated animals spent significantly ( $U_{n1=16, n2=50}=1.000$ ,  $p=0.0116$ ) more time on the open arm ( $44.4 \pm 9.4$  % vs.  $3.2 \pm 3.2$  %; Fig 5E), less time in the closed arm ( $45.0 \pm 9.3$  % vs.  $88.1 \pm 5.8$  %,  $U_{n1=44, n2=22}=1.000$ ,  $p=0.0087$ ; Fig 5F) and showed increased locomotion ( $17.6 \pm 2.2$  m vs.  $8.0 \pm 1.2$  m,  $U_{n1=15, n2=61}=0.0$ ,  $p=0.0043$ ; Fig 5G). Time in center was unaffected (see B). These observations indicate a decrease in open-arm avoidance, which however, could be confounded by the increased activity. Therefore a decrease of active risk assessment (shown earlier to be sensitive to systemic diazepam treatment; see Fig 1F) in MUSC treated HAB mice (Fig 5H), namely number of

350 SAPs (MUSC  $5.0 \pm 3.5$  vs. VHC  $19.6 \pm 3.4$ ,  $U_{n1=45, n2=21} = 0.0$ ,  $p = 0.008$ ) supports the decrease in defensive  
 351 responses. Moreover, the duration of SAPs was significantly decreased within the first 5 minutes of  
 352 the EPM task with significant group effect ( $F_{1,9} = 13.71$ ,  $p = 0.0049$ , 2-way rmANOVA; Fig 5H). Finally, all  
 353 animals were tested two times on two consecutive days for their disposition to vocalize during a  
 354 5 min TST, using a crossover design. Half of the animals received either VHC or MUSC treatment,  
 355 which was swapped at the following day. Whereas 86% of VHC treated HAB mice emitted at least  
 356 one sonic call during a 5 min TST, none of the MUSC treated animals vocalized (Fisher's exact,  
 357  $p < 0.0001$ ; Fig 5I). All calls were in the sonic range. Fig 5J (*upper panel*) shows the spectral analysis  
 358 of sonic vocalizing HAB mice (two mice have been excluded due to their low disposition of only  
 359 short calls). Evidently HAB mice vocalize at a dominant frequency of 4090 Hz with a strong 1<sup>st</sup>  
 360 harmonic at 8180 Hz. All recordings were carried out using a USV transducer and were scored  
 361 online using the heterodyne headphone output, thereby we can exclude that MUSC treated animals  
 362 vocalized in the ultrasonic range only. Fig 5J (*lower panel*) shows an exemplary sonic call with the  
 363 dominant frequency in the 4 kHz range, and formant harmonics up to approx. 16 kHz. In some  
 364 calls (white asterisks) we can see that these harmonics even range up to 40-50 kHz, however these  
 365 signals do not resemble any typical rodent ultrasonic call. These results, indicate an increased  
 366 tonic activation of the PAG in HAB mice, which precipitates as an exaggerated open-arm avoidance  
 367 behavior accompanied by a strong disposition to emit sonic calls, which could be reverted by low  
 368 doses of muscimol.

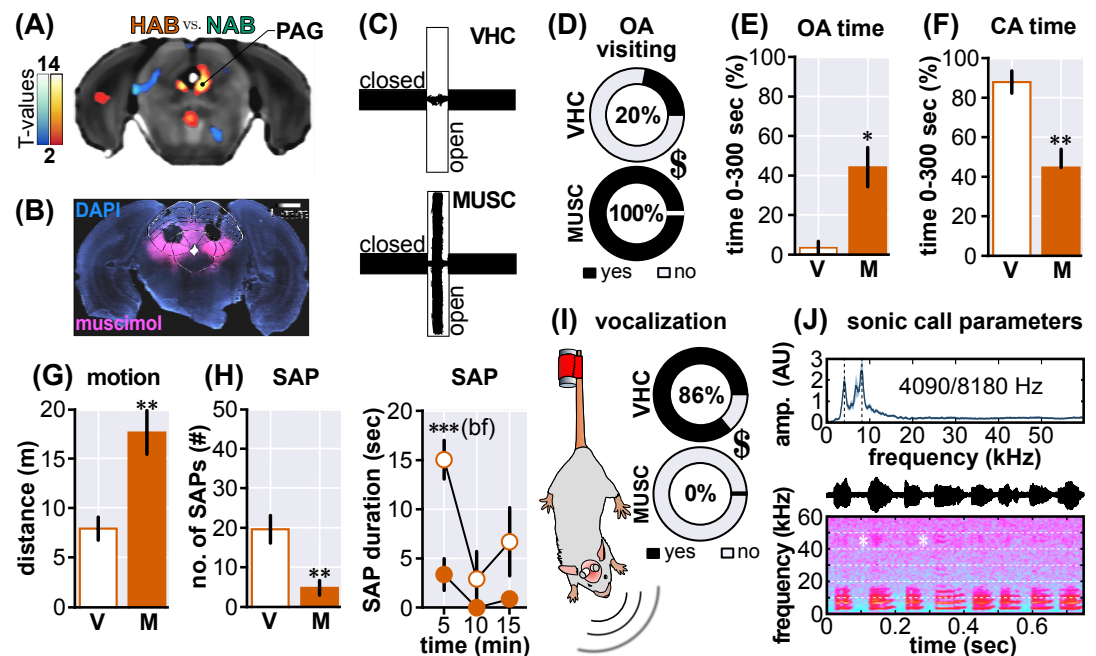

### Figure 5. Reversing High-anxiety Phenotype of HAB Mice

(A) Manganese enhanced MRI (MEMRI) of HAB ( $N=31$ ) vs. NAB ( $N=26$ ) animals showed a significantly increased accumulation of  $Mn^{2+}$  within the periaqueductal gray of HAB. (B) Exemplary brain section at approximately the same slice location as the MEMRI image, depicting extent of fluorescently labeled muscimol (MUSC) diffusion (magenta) at the level of the periaqueductal gray. The nuclear DAPI counterstain is shown in cyan and overlaid by the outlines of the SC and PAG. Asterisk marks tissue lesion due to cannula placement. (C) Exemplary movement trace of a vehicle (VHC) and MUSC treated HAB mouse on the EPM. VHC ( $N=5$ ) or MUSC ( $N=6$ ) treated HAB animals were tested for their behavior on the EPM (30 minutes), and the percentage of open arm (OA) visiting animals (D), OA time (E), closed-arm (CA) time (F) and locomotion (G) was assessed within the first 5 minutes. (H) Moreover the active risk assessment parameters, i.e. the total number of stretched-attend postures (SAP) and the duration of SAPs over time (0-15 min) were scored. (I) Finally, animals ( $N=14$ ) have been treated with VHC and MUSC in a crossover design and subjected to a 5 min tail-suspension test (see cartoon), in order to assay the disposition to vocalize. (J) *Upper panel*: Spectral analysis of vocal call emitted by HAB ( $N=10$ ). Depicted is the average (black) together with the SEM (blue). Dashed horizontal lines indicate the dominant frequency at 4090 Hz and the first harmonic at 8180 Hz. *Mid panel*: Exemplary call of a HAB animal; hull curve of raw signal. *Lower panel*: Sonogram of the same call. Note the formant structure of the harmonics. Asterisks denote rare and slight ultrasound artifacts within the 40-50 kHz range, which occur due to the expelled air itself. Asterisks indicate significance values obtained by Mann-Whitney test if not stated otherwise, \*  $p < 0.05$ , \*\*  $p < 0.01$ , \*\*\*  $p < 0.001$ ; dollar signs indicate significance values obtained by Fisher's exact tests, \$  $p < 0.05$ , \$\$  $p < 0.01$ . Significance values obtained by 2-way rmANOVA, followed by Bonferroni post-hoc test are indicated with *bf*. Values are given as mean $\pm$ SEM.

## 369 Discussion

370 The inner feelings during states of anxiety, fear and panic of laboratory animals are not accessible  
371 to the experimenter. Instead one has to rely on behavioral and physiological readouts. Due to  
372 the rather continuous nature of the behavioral expression of anxiety, fear and panic, these states  
373 appear as a function of the animals defensive survival circuits. While this does not preclude a  
374 classification of the observed measures, it eliminates the possibility to ascribe a certain inner state  
375 to a behavioral category. In the description of the results presented in this study, we have limited  
376 ourselves to the use of *avoidance* for situations where the animal controls its exposure to a threat  
377 (emergence tasks), *active risk assessment* for the display of stretched-attend postures and *defensive*  
378 *responses* for directed and undirected flight and tonic immobility (freezing).

380 Previous studies investigating the neuropharmacological basis of altered open-arm avoidance  
381 of inbred mouse strains using the EPM, report a consistent dose-dependent *anxiolytic* effect of  
382 systemically administered benzodiazepines (Rodgers et al., 1992; Cole and Rodgers, 1995; Holmes  
383 and Rodgers, 1999; Griebel et al., 2000) which emphasizes the predictive validity of this testing  
384 situation. More recent studies which assess the involvement of specific brain areas in the expression  
385 and regulation of open-arm avoidance in rats and mice implicate the prefrontal cortex (PFC)  
386 (Adhikari et al., 2010, 2011; Kumar et al., 2013), bed nucleus of the stria terminalis (BNST) (Kim et al.,  
387 2013), lateral septum (LS) to anterior hypothalamic area (AHA) projection (Anthony et al., 2014),  
388 medial septum (MS) (Shin et al., 2009; Zhang et al., 2017), septo-habenular pathway (Yamaguchi  
389 et al., 2013), basolateral amygdala (BLA) (Sorregotti et al., 2018) and specifically its projections  
390 towards the central nucleus of the amygdala (CeA) (Tye et al., 2011) and ventral hippocampus (vHPC)  
391 (Felix-Ortiz et al., 2013) and PFC (Felix-Ortiz et al., 2016), vHPC to PFC projection (Padilla-Coreano  
392 et al., 2016), vHPC-lateral hypothalamic area (LHA) projection (Jimenez et al., 2018), habenula (Hb)  
393 (Pang et al., 2016), interpeduncular nucleus (IPN) (Zhao-Shea et al., 2015), laterodorsal tegmentum  
394 (LdT) (Yang et al., 2016) but also the PAG (Santos et al., 2003; Netto and Guimarães, 2004; Borelli  
395 and Brandão, 2008; Lima et al., 2008; Campos and Guimarães, 2009; Mendes-Gomes and Nunes-  
396 de Souza, 2009; Terzian et al., 2009; Muthuraju et al., 2016) and the SC (Muthuraju et al., 2016). It  
397 is clear that all these brain structures cannot mediate the same types and aspects of avoidance  
398 behavior (e.g. social, olfactory, visual & auditory cues), but nevertheless they all modulate the  
399 same behavioral readout. While this broad spectrum of potentially involved circuits might be  
400 advantageous for initial behavioral screening purposes, the interpretation of the observed behavior  
401 on the EPM demands extra care. Consequently, referring to this behavior as *anxiety-like* is an  
402 oversimplification. In this study we presented data obtained from mouse lines which were generated  
403 under the simple assumption that the level of open-arm avoidance is a proxy for *anxiety* (Krömer  
404 et al., 2005).

405 It has to be noted that similar to the bidirectional selective breeding for open-arm avoidance  
406 in mice, there has been an earlier approach in rats which resulted in high-anxiety and low-anxiety  
407 behaving animals (for review see Landgraf and Wigger, 2003; Landgraf et al., 2007). However, even  
408 though the findings obtained with HAB/LAB rats are highly relevant in the face of preclinical anxiety  
409 research, their discussion is beyond the scope of this study.

410  
411 We have shown that the open-arm avoidance phenotypes of two mouse-lines which have  
412 been selectively bred for extremes in so-called *anxiety-like* behavior (HAB and LAB mice), based  
413 on their behavior on the EPM, are accompanied by paralleled changes in the level of defensive  
414 responses. This was demonstrated using two novel multi-sensory behavioral paradigms (Robocat,  
415 IndyMaze) which allowed the repeated assessment of innate escape behavior towards an approach-  
416 ing threatening stimulus. Further, we have discovered that LAB mice lack a functional retina due  
417 to a homozygous mutation in the *Pde6b*<sup>rd1+/+</sup> allele which is indicative of the *retinal degeneration*  
418 *1 (rd1)* mutation and leads to blindness shortly after birth. Nonetheless, applying MEMRI-guided

419 *in-vivo* neuronal circuit inquiry using the activating DREADD hM3Dq in the SC of LAB mice, we  
420 were able to demonstrate that increasing the neuronal activity within a midbrain multi-sensory  
421 integration circuit is sufficient to increase the level of innate defensive responses even in blind  
422 animals which ultimately precipitates as increased open-arm avoidance on the EPM. Further, using  
423 a similar approach but employing local injections of the potent GABA<sub>A</sub>-agonist muscimol into the  
424 PAG of HAB mice, we could show that also in this case a modulation of the neuronal activity within  
425 the midbrain survival circuits is sufficient to reverse the dominant open-arm avoidance phenotype.

### 426 **The Multidimensional Nature of Selective Breeding**

427 Both bottom-up (which start from a defined genetic alteration or neuronal subpopulation or brain  
428 structure) and top-down approaches (which start from a distinct behavioral phenotype) hold the  
429 promise to decipher the molecular and cellular basis of anxiety-like behavior (*Anderzhanova et al.,*  
430 *2017*). The latter approach includes selective breeding and allows to study behavioral phenotypes  
431 on a polygenic background, which resembles the situation in most psychiatric diseases (*Landgraf*  
432 *et al., 2007; Anderzhanova et al., 2017*). It assumes that the resulting extremes in anxiety-like  
433 behavior reflect extremes in the normal distribution of the same behavioral trait (*Sartori et al.,*  
434 *2011b*). Accordingly, a direct comparison between the two extremes is expected to provide an  
435 optimal signal-to-noise ratio to disentangle molecular and cellular correlates of the phenotype.  
436 In fact, activity propagation through the amygdala circuit seems to support a dimensional shift  
437 from HAB via NAB to LAB phenotype (*Avrastos et al., 2013*), and many behavioral readouts show a  
438 similar pattern (see Table 1). The present study, however, demonstrates that this strategy might  
439 be misleading if not entirely wrong: First, measurements of differences in activity-dependent  
440 accumulation of Mn<sup>2+</sup> did not reveal a single brain structure with bidirectional changes in signal  
441 intensity in HAB and LAB compared to NAB mice. Second, we identified impairments in sensory  
442 perception as a putative source of threat neglect in LAB mice. The *rd1* mutation freely segregates  
443 in many mouse strain populations, including CD1 (the ancestor strain used for the initial step of  
444 selective breeding). It stands for a nonsense mutation in the photoreceptor phosphodiesterase  
445 6b (Pde6b). In case of homozygosity, the recessive mutation results in photoreceptor loss and  
446 retina degeneration. It is conceivable that the selective breeding of LAB is based, at least in part, on  
447 co-selection for *rd1* and the resulting physical blindness. Due to the lack of material, we cannot  
448 trace back the time point of first occurrence of homozygosity since the establishment of the LAB  
449 line more than 15 years ago (*Krömer et al., 2005*). In any case, data obtained in the past by direct  
450 comparison of LAB vs. HAB have to be (re-)interpreted with great care.

### 451 **In-vivo Imaging**

452 We employed *in vivo* MEMRI imaging to investigate the neural basis of extremes in anxiety-like  
453 behavior. Other than expression of immediate early genes or accumulation of radioactive derivatives  
454 of glucose which measure phasic changes in neuronal activity upon acute exposure to a threatening  
455 situation, repeated injections of MnCl<sub>2</sub> are expected to result in intracerebral accumulation of  
456 Mn<sup>2+</sup> also in cells with tonic (i.e., lasting) changes in neuronal activity. Importantly, MEMRI has the  
457 potential to non-invasively map whole-brain activity (*Bangasser DA, 2013; Bissig and Berkowitz,*  
458 *2009; Chen et al., 2013, 2007; Eschenko et al., 2010; Hoch et al., 2013; Laine et al., 2017; Tang*  
459 *et al., 2016*). Mn<sup>2+</sup> enters active neurons through voltage-gated calcium channels (*Drapeau and*  
460 *Nachshen, 1984*) (e.g. Ca<sub>v</sub>1.2; (*Bedenk et al., 2018*)), is transiently kept intracellularly (*Gavin et al.,*  
461 *1990*) and preferentially accumulates in projection terminals (*Bedenk et al., 2018*), which suggests  
462 its application for connectome analyses. Although our animals were not explicitly challenged, it has  
463 to be noted that the injection procedure per se may act as an acute stressor which triggers distinct  
464 neural responses in the different mouse lines. In fact, mice showed a prominent corticosterone  
465 secretion following treatment with Mn<sup>2+</sup>, which declined over the course of repeated injections  
466 (*Grünecker et al., 2010*).

467 Voxel-wise comparisons revealed a variety of brain structures with lower or higher Mn<sup>2+</sup> accu-

468 mulation in HAB or LAB vs. NAB. A detailed discussion of each of them is far beyond the scope  
469 of the present study. We wish to mention only a few prominent (and unexpected) findings such  
470 as the globus pallidus (GP) in LAB and the septo-hippocampal system in HAB. The GP is primarily  
471 associated with motor and associative functions (*Deniau et al., 2010*). However, it seems to play an  
472 important role also in the expression of aversive behaviour, including fear and anxiety (*Talalaenko*  
473 *et al., 2008*). Local administration of serotonin and glutamic acid into the GP effectively suppressed  
474 anxiety-like behaviour in the threatening situation avoidance test (*Talalaenko et al., 2008*), and  
475 downregulation of the corticotropin releasing factor receptor 1 led to an anxiogenic effect (*Sztain-*  
476 *berg et al., 2011*). Further clinical evidence for crucial involvement of the GP in anxiety mediated  
477 behaviour is given by the fact that deep brain stimulation within the GP was accompanied by a  
478 decrease of anxiety symptoms in depressive patients (*Kosel et al., 2007*) as well as patients suffering  
479 from Parkinson's disease (*Tröster et al., 1997*). We cannot entirely rule out that the differences in GP  
480 activity may relate to line differences in general locomotor activity (*Yen et al., 2013, 2015*). However,  
481 one would assume that increased motor activity, if at all, would lead to increased accumulation of  
482  $Mn^{2+}$  in the motor network, resulting in an effect of order LAB > NAB not LAB < NAB.

483 Our finding of increased activation of the septal-hippocampal system in HAB is particularly  
484 interesting, given its suggested involvement in generalized anxiety disorder (*Gray and McNaughton,*  
485 *2000*). Septal lesions were reported to increase the time spent on the open arm of the EPM and to  
486 decrease the time spent burying the shock probe (*Menard and Treit, 1996*), and the local adminis-  
487 tration of the arginine vasopressin receptor antagonist into the septum of rats led to an increased  
488 time spent on the open arm of the EPM (*Liebsch et al., 1996*). Septal neurons which express the  
489 corticotropin releasing factor receptor 2 project to the hypothalamus and promote anxiety-like  
490 behavior (*Anthony et al., 2014*). Also the hippocampus has been implicated in anxiety-like behavior  
491 (*Bannerman et al., 2004*), in particular its ventral part (*Felix-Ortiz et al., 2013; Padilla-Coreano et al.,*  
492 *2016; Jimenez et al., 2018*). Therefore, it is tempting to assume that the higher activity status of the  
493 hippocampus in HAB mice indicated by increased  $Mn^{2+}$  accumulation causally links to exaggerated  
494 fear and anxiety-like behavior shown by the animals. This interpretation is supported by PET-studies  
495 in rhesus monkey which report increased brain activity in the hippocampus of hyperanxious animals  
496 (*Oler et al., 2010*). Interestingly, also LAB mice show higher  $Mn^{2+}$  accumulation in the hippocampus  
497 formation, which seems to contradict our interpretation. However, we observed a prominent signal  
498 at the level of the dorsal dentate gyrus, which has been associated with hyperlocomotion and  
499 decreased anxiety before (*Kheirbek et al., 2013*), thus resembling the LAB phenotype (*Yen et al.,*  
500 *2013*).

## 501 **Midbrain Structures Control the Level of Open-arm Avoidance, Risk Assessment** 502 **and Defensive Behavior**

503 Among the many brain structures with different accumulation of  $Mn^{2+}$ , there were also parts of  
504 the midbrain/tectum, which showed reduced (e.g., superior and inferior colliculus in LAB mice) or  
505 enhanced (PAG in HAB mice) signal intensities. The superior colliculus is a multimodal sensory-  
506 motor structure that receives inputs from the retina and somatosensory cortex (*King, 2004; Shi*  
507 *et al., 2017*). Efferences from the superior colliculus trigger a variety of defensive responses (*Shang*  
508 *et al., 2015; Evans et al., 2018*). Therefore, the reduced activity status of the superior colliculus may  
509 reflect both reduced sensory inputs (i.e., threat detection; (*Almada et al., 2018*)) and reduced threat  
510 responding. Physical blindness alone is insufficient to explain the behavioral phenotype in the  
511 IndyMaze (where LAB mice failed to show flight responses even after contact with the styrofoam ball)  
512 and on the EPM (low level of risk assessment). Indeed, we could reduce the 'emotional blindness' by  
513 chemogenetic activation of the superior colliculus. In HAB, the enhanced  $Mn^{2+}$  accumulation spans  
514 the entire caudal part of the PAG and resembles the enhanced expression of c-Fos in HAB mice  
515 which had been confined to an open arm of the EPM (*Muigg et al., 2009*). The increased activity in  
516 ventral parts of the PAG correspond to the prevalence of HAB mice for showing passive defensive  
517 responses (*Bandler R, 2000; Tovote et al., 2015*)(see also Table 1). The increased activity in dorsal

518 parts is more surprising, given their association with active defensive responses (**Bandler R, 2000**).  
519 Only recently we could demonstrate that HAB mice show exaggerated active fear to an approaching  
520 robo-beetle (**Heinz et al., 2017**), which is in accordance with the exaggerated flight responses to  
521 the Robocat shown in the present study. Remarkably, inactivation of the dorsal PAG led to the  
522 most striking changes in EPM behavior observed so far in this mouse line. This also applied to the  
523 reduction in risk assessment and the complete absence of defensive vocalization.

## 524 **Of Fear and Anxiety**

525 In animals, anxious states are prototypically assessed in exploration- or interaction-based tasks  
526 which involve approach-avoidance conflicts (**Belzung and Griebel, 2001; Millan, 2003; Cryan and**  
527 **Holmes, 2005; Sousa et al., 2006**). Avoidance measures alone are insufficient to describe the behav-  
528 ioral phenotype, since they might be confounded by alterations in exploratory drive. Therefore, it is  
529 strongly recommended to additionally assess ethobehavioral parameters which reflect approach  
530 behavior towards a (potentially) threatening environment/object (**Gray and McNaughton, 2000**).  
531 Here we report bidirectional changes in risk assessment (**McNaughton and Corr, 2018**) on the EPM  
532 in HAB and LAB vs. NAB mice, which were sensitive to diazepam treatment and could be reverted  
533 by pharmacological or chemogenetic interventions at midbrain/tektal structures. Open-arm explo-  
534 ration, in contrast, was insensitive to diazepam and, thus, seems to be less suited as a measure of  
535 anxiety-like behavior. This might be ascribed to the stringent selection process over the generations  
536 (**Krömer et al., 2005**), and the threat intensity due to the combination of height and open spaces.  
537 Accordingly, during the first phase of the IndyMaze, when mice have to leave the home compart-  
538 ment to explore the hollow way engulfed by side and end arms, HAB mice showed a strong increase  
539 in emergence latencies. This time, however, this parameter was sensitive to diazepam treatment,  
540 possibly because of a less threatening impact of the test situation. Importantly, HAB mice readily  
541 explored the entire setup, once they had left the home compartment. Therefore, differences in  
542 EPM or IndyMaze exploration cannot be ascribed to a general lack in motivation/exploratory drive  
543 or locomotor behavior, but to state anxiety. To study the consequences of extremes in anxiety-like  
544 behavior on defensive responses to explicit threat, we decided to develop ethobehavioral tasks  
545 (**Pellman and Kim, 2016**), which allow for the measurements of active defensive responses as a  
546 function of defensive distance and to judge their adaptive vs. maladaptive nature. In the IndyMaze,  
547 mice were confronted with an approaching styrofoam ball, which spans the entire width of the  
548 hollow way. Whereas both HAB and NAB escaped from the ball, the behavior of LAB mice was  
549 clearly maladaptive, since virtually all mice were overrun by the ball at least once (without physical  
550 harm). As discussed before, increased neuronal activity in the superior colliculus reestablished  
551 flight behavior in the majority of the animals, demonstrating that not exclusively sensory deficits (i.e.,  
552 physical blindness) can explain the deficits in defensive behavior. A similar picture emerged from  
553 the Robocat exposure, which resembles the robogator described before (**Choi and Kim, 2010; Amir**  
554 **et al., 2015; Pare and Quirk, 2017**). Again, LAB mice were at high risk to collide with the Robocat.  
555 This time, also the behavior of HAB mice turned out to be maladaptive, since no mouse could  
556 bypass the Robocat even if not at risk to collide with it. Together with our previous observation of  
557 increased avoidance of an approaching robo-beetle (**Heinz et al., 2017**), this finding suggests that  
558 selection for high levels of anxiety-like behavior on the EPM coincides with exaggerated defensive  
559 responses, both passive (see Table 1) and active.

## 560 **Conclusion**

561 Using well-established mouse lines with extremes in anxiety-like behavior, we demonstrate that  
562 extremes in anxiety coincide with (i) extremes in defensive responses to an approaching threat and  
563 (ii) tonic changes in neuronal activity, among others in midbrain/tektal structures, (iii) which – if  
564 reverted – ameliorated both fear- and anxiety-like behavior. In addition, we provide evidence for (iv)  
565 the multidimensional nature of increased vs. decreased defensive behavior, which may include  
566 deficits in sensory perception. Our results challenge the uncritical use of the anthropomorphic terms



567 anxiety or anxiety-like for the description of mouse behavior on the EPM or in other exploration-  
568 based tasks (*for review see Ennaceur, 2014*), as they imply higher cognitive processes, which are  
569 not necessarily in place. The explicit fear of height (acrophobia) and/or open spaces (agoraphobia)  
570 sufficiently explains the lack of open-arm exploration. The recently initiated discussion about the  
571 uncritical use of the term 'fear' where 'threat' would be more appropriate (*LeDoux, 2012*) has forced  
572 the scientific community to reconsider its terminology, even though the term 'fear' still keeps its  
573 merits (*LeDoux, 2014, 2017*). We face a similar if not more eminent problem, if we uncritically  
574 use the term 'anxiety' in translational studies on animal behavior. Instead, we should describe  
575 defensive responses as they are, preferentially along the continuum of the *predatory imminence*  
576 *model* (*Perusini and Fanselow, 2015*).

## 577 **Methods and Materials**

### 578 **Animals**

579 Adult (3-8 months), male mice of the following strains have been used: C57BL/6N (B6) ( $N=12$ ), HAB  
580 ( $N=154$ ), NAB ( $N=76$ ), LAB ( $N=99$ ), CD1 ( $N=12$ ), resulting in a total number of 353 animals. All animals  
581 were bred in the animal facilities of the Max Planck Institute of Biochemistry, Martinsried, Ger-  
582 many. The animals were group-housed (2-4 animals per cage) under standard housing conditions:  
583 12h/12h inverted light-dark cycle (light off at 8AM), temperature  $23\pm 1^\circ\text{C}$ , food and water *ad libitum*.  
584 Experimental procedures were approved (55.2-1-54-2531: 44-09, 188-12, 142-12, 133-06, 08-16)  
585 by the State of Bavaria (Regierung von Oberbayern, Munich, Germany). Animal husbandry and  
586 experiments were performed in strict compliance with the European Economic Community (EEC)  
587 recommendations for the care and use of laboratory animals (2010/63/EU). All efforts were done to  
588 minimize the number of experimental subjects and to preclude any animal suffering.

### 589 **Drugs**

590 The anxiolytic diazepam (Diazepam-Lipuro<sup>®</sup>, BRAUN Melsungen, Germany) was diluted in physiolog-  
591 ical saline (vehicle) and injected systemically (1 mg/kg, i.p.) using a volume of 100  $\mu\text{l}$  per 10 g body  
592 weight. Clozapine-*N*-oxide (CNO, Tocris #4936) was dissolved in dimethyl sulfoxide (DMSO, Sigma-  
593 Aldrich, #472301) at a stock concentration of 75 mM and stored at  $-20^\circ\text{C}$ . The final concentration of  
594 CNO was 292  $\mu\text{M}$  (1 mg/kg at 100  $\mu\text{l}$  per 10 g body weight) in saline ( $<0.5\%$  DMSO). Muscimol MUSC  
595 (Sigma-Aldrich, #M1523) and fluorescently-labeled muscimol (fMUSC) (BODIPY<sup>®</sup>TMR-X conj. Thermo  
596 Fisher Sc. M23400) was dissolved in artificial cerebrospinal fluid (aCSF) (*Baarendse et al., 2008*).  
597 MUSC itself has a molecular weight of 114.1 g/mol whereas the fMUSC (MW 607.46 g/mol) is 5.324x  
598 heavier. In previous experiments with MUSC, we found a concentration of 10 ng/100 nl (876.4  $\mu\text{M}$ )  
599 most effective, therefore we have used 53.24 ng/100 nl fMUSC to achieve the same physiological  
600 effect. As the fMUSC is poorly water-soluble, we dissolved 1 mg in 1.878 ml aCSF to reach a final  
601 ready to use concentration of 876.6  $\mu\text{M}$ . Whereas the EPM experiments were conducted using  
602 MUSC, the vocalization experiments only involved fMUSC. The vocalization experiment was carried  
603 out using a crossover design: half of the animals received fMUSC on the first day, whereas the other  
604 half received VHC (aCSF). On the next day the treatment was switched. 1-3h after the experiment  
605 the animals which received fMUSC were transcardially perfused (4% PFA in PBS), whereas the  
606 remaining animals received another injection of fMUSC on the following day and were also perfused  
607 1-3h after the injection.

### 608 **Behavioral Tests**

#### 609 **Elevated Plus Maze**

610 The elevated plus maze (EPM) apparatus consisted of two open (L30xW5 cm) and two closed  
611 (L30xW5xH15 cm) arms which were connected via a central platform (L5xW5 cm). All parts of the  
612 EPM were made of dark gray PVC. The apparatus was elevated 37 cm above a table (H50 cm), which  
613 was placed in the center of the dim illuminated experimental room (5x4 m). The light intensity

614 (luminous flux) at the open arms was 7 lux. Before the experiment every subject was tested for the  
615 disposition to emit sonic vocalizations by lifting them 3 times from the grid cage top (*Whitney, 1970*).  
616 At the beginning of each trial, the animal was placed near the central platform facing a closed arm.  
617 Each trial lasted for 30 minutes and was videotaped. The animals behavior was analyzed using a  
618 behavioral tracking software (ANY-maze, Stoelting CO., USA) and the percentage of time spent on  
619 the open (OA) and closed (CA) arm and the central zone (time in center) as well as the total distance  
620 traveled were determined. In order to render these results comparable to other EPM experiments  
621 found in the literature, the data (except for latency and stretched-attend postures, SAPs) of the  
622 first 5 minutes of each trials is reported. Other behavioral parameters which were analyzed by  
623 an experienced observer, blind to the experimental conditions, included number and duration of  
624 SAPs within the first 15 minutes of each trial, and the latency for the first full entry to the open  
625 arm (all four paws) within the entire 30 minutes exposure. After the trial the fecal boli on the EPM  
626 apparatus were counted as a measure of autonomic arousal. In between the trials the apparatus  
627 was cleaned with tap water containing detergent, and was subsequently dried with tissues.

#### 628 Robocat Task

629 The Robocat (for a detailed explanation of the task *see* ) has been inspired by the Robogator  
630 (*Choi and Kim, 2010*). It is a four-wheeled robot (Lego Mindstorms), equipped with ultrasound  
631 range finders and programmed to advance for 25 cm (speed 25 cm/s) once a movement has been  
632 detected within the sensor range of 50 cm. Despite the name suggests, no extra effort has been  
633 invested to disguise the robot as a cat, except two little cardboard ears. The task is conducted  
634 within a longitudinal arena (H35×W50×L150 cm, whereby the robot is placed 125 cm away from  
635 the start compartment (H35×W50×L12.5 ). The access to the arena is provided via a sliding door,  
636 operated by the experimenter, and the natural exploratory drive (neither bait, nor food or water  
637 deprivation used) ultimately leads to the mouse-robot encounter. Once the mouse triggers the  
638 robot, its movements typically evoke a robust flight response and the mouse retrieves to the start  
639 compartment. All animals were first pre-exposed to the entire setup with unrestricted access to  
640 the arena (sliding door opened) in absence of the Robocat. On the following consecutive 3 days  
641 each animal was subjected to habituation trials which consisted of 10 minutes acclimatization  
642 within the start compartment (to enable the mice to form a home base), followed by 10 minutes of  
643 free exploration in the arena, again without the Robocat. The test trial on day 4 was conducted in  
644 identical manner, except that the Robocat was placed in the arena. During the test trial, the animals  
645 typically activated the Robocat several times. All trials were videotaped and the behavior was  
646 analyzed offline by an experienced observer, blind to the experimental conditions. The behavioral  
647 readouts were flight (activation + retrieval), bypass (activation but tolerance to the approaching  
648 Robocat which is bypassed by the animals) or collision, and were counted if observed at least once.  
649 Only animals which activated the Robocat at least once were considered for analysis.

#### 650 IndyMaze Task

651 Inspired by the movie *Indiana Jones and the Raiders of the Lost Ark* (*Spielberg and Marshall, 1981*), the  
652 IndyMaze is conducted within a narrow, stretched arena (H35×W16×L150 cm), which was divided  
653 into six equidistant (25 cm) sectors. To one end of the arena, a small custom-made plexiglass  
654 cage (H30×W16×L25 cm), equipped with bedding material, was connected which served as a home  
655 compartment. The arena itself was slightly tilted towards the home compartment and indirectly  
656 lit (<10 lux). To enter the arena, the animals had to climb over a small barrier (height: 2 cm). This  
657 prevented the animals from 'accidentally' dropping into the arena and forced them to explicitly  
658 decide when to initiate its exploration. For the task, each animal was first placed into the home  
659 compartment and was allowed for a maximal duration of 30 minutes to step (with four paws)  
660 into the arena (latency 1<sup>st</sup> entrance). Once the animal had entered the arena, the time to reach  
661 the last sector was noted (latency for end-exploration). After the end exploration, the animals  
662 typically retrieved to the home compartment or were gently forced to do so by the experimenter.

663 With low latency the animals re-entered the arena but this time a styrofoam ball ( $\varnothing$ 15cm , 100 g)  
664 was introduced at the last sector, which was allowed to roll (25 cm/s) towards the animal once it  
665 passed the midline (75 cm). The animals either responded with (a) preemptive flight or a retrieved  
666 once the ball hit them (both counted as defensive responses), or (b) they were overrun by the ball  
667 (without any physical harm) and continued to explore the arena. The threat exposure part of the  
668 behavioral paradigm was carried out for a maximal duration of 30 minutes or once the animals had  
669 encountered the ball three times. The behavior was scored online by the experimenter during the  
670 task unaware of the mouse line.

### 671 Optomotor Response

672 In order to assess the visual performance of male C57BL/6N, CD1, HAB, NAB and LAB mice ( $N=12$ ),  
673 the animals' optomotor response (*Abdeljalil et al., 2005*) has been tested using the rotating drum  
674 task. The task is based on the mice's predisposition to fixate on moving vertical black/white stripes  
675 and follow their rotation with short movement bouts, involving the entire head. By decreasing the  
676 stripe width, higher visual acuity is necessary to resolve the stripes. The apparatus consisted of a  
677 rotating cylinder (drum,  $\varnothing$ 33 cm, height 35 cm), whose inner walls were lined with an alternating  
678 black/white stripe pattern using a stripe width of 2.88 cm, giving a spatial frequency of 0.05 cycles  
679 per degree (cyc/deg,  $r=16.5$  cm, arc length per black/white cycle 5.76, angle  $20^\circ$ ). During the task, the  
680 animals were placed within the center of the drum on a  $\varnothing$ 11.5 cm fan grid which was mounted 16  
681 cm above the bottom. The rotation of the drum was controlled via a custom-built microprocessor-  
682 based motor driving circuit which operated a geared motor. The rotational speed of the drum  
683 was set to 2.5 rounds per minute (rpm). For the task the animals were placed into the drum for  
684 1 minute to acclimatize (bright illumination 500 lux) and subsequently the drum started to rotate  
685 for 60 seconds clockwise, followed by a 30 seconds break and then rotated in counter-clockwise  
686 direction for additional 60 seconds. All experiments were videotaped and analyzed offline (blind to  
687 the strains with same fur color, i.e. CD1, HAB, NAB and LAB), whereas every head movement was  
688 scored as an optomotor response if it was directed into the same rotational direction as the drum.  
689 This modified version of the original task (*Abdeljalil et al., 2005*) does certainly not allow to make  
690 detailed statements regarding different levels of visual acuity, though it is sufficient to assess the  
691 general visual performance of the mouse strains in question.

## 692 Physiological Measurements

### 693 Electroretinography

694 In order to assess the retinal function of male C57BL/6N, CD1, HAB, NAB and LAB animals ( $N=6$   
695 each), flash-evoked electroretinographic (fERG) measures in the anesthetized animals have been  
696 employed. To this end, the animals were dark-adapted for  $> 3$  h prior to the experiment. Under  
697 dim red light (650 nm) illumination, the animals were weighed and received analgesic treatment  
698 (200 mg/kg Novalgin/Metamizol s.c. in saline in a concentration to obtain  $100 \mu\text{l}/10$  g of body  
699 weight) and subsequently transferred from their home-cage to the anesthesia chamber (isoflurane  
700 4%). After reaching surgical tolerance, indicated by the absence of the eye-lid and paw-withdrawal  
701 reflex, the animals were transferred to a modified stereotaxic frame where the anesthesia was  
702 maintained with isoflurane (2-3 % in oxygenated air, using an oxygen concentrator, EverFlo). The  
703 body temperature was monitored and controlled ( $37.5^\circ\text{C}$ ) using an animal temperature controller  
704 (WPI Inc. #ATC2000) in combination with a small rodent rectal temperature probe (WPI Inc. #RET-3)  
705 and a small heating-pad ( $15\times 10$  cm) with built-in RTD sensor (WPI Inc. #61830) with an additional  
706 silicone pad to ensure maximal heat transfer (WPI Inc. #503573). For the analgesic treatment to  
707 have an effect, the animals was allowed to reach a stable anesthesia for  $>15$  min, while the eyes  
708 were kept moisturized with 0.9 % (w/v) physiological sodium chloride solution (saline). Subsequently  
709 the pupils were dilated maximally using 2.5 % phenylephrine (Sigma #P6126, in PBS, pH adjusted  
710 to 7.0) and 1 % (w/v) atropine (Sigma # A0132, in PBS, pH adjusted to 7.0) and the eyes were  
711 henceforward kept moisturized using 1 % methyl cellulose (Carl Roth #8421) in saline. The ERG

712 electrodes were custom made using  $\varnothing 200 \mu\text{m}$  uncoated gold wire wound to form  $\varnothing 3 \text{ mm}$  loops and  
713 were placed gently on the eyes of the animal. A stainless steel wire wrapped around the animal's  
714 tail served as the ground electrode. All signals were bandpass filtered at 0.1-300 Hz and sampled at  
715 30 kHz using the Open-Ephys (*Siegle et al., 2017*) system in conjunction with a headstage based  
716 on the Intan RHD2132 integrated extracellular amplifier circuit. The animals left eye was covered  
717 with a piece of light proof black PVC and additionally shielded from the right side using aluminum  
718 foil. The animals right side was stimulated using a Ping-Pong ball which was cut in half (*Green*  
719 *et al., 1997*) and illuminated with a white LED (Osram Oslon LUW CN7N) which was controlled  
720 via a custom-made constant current source. Thereby scotopic and photopic (3 lux background  
721 illumination) measurements were carried out which involved the display of 32 light flashes (per  
722 condition) of 40-180  $\mu\text{s}$  length at a frequency of 1 Hz at three different light intensities. The light  
723 intensities were measured (65 lux, 225 lux, 420 lux) using a hand-held lux meter (Iso-Tech ILM 1335)  
724 and the respective  $\log \Phi \cdot \text{rod}^{-1} \cdot \text{s}^{-1}$  values were calculated using the following relation:

$$725 \quad 1 \text{ photopic lux} = 650 \text{ photoisomerizations } (\Phi) \cdot \text{rod}^{-1} \cdot \text{s}^{-1} \text{ (Pugh et al., 1998).}$$

726 All 32 acquired responses per condition were averaged and the datasets were further analyzed  
727 using custom Python2.7 scripts.

### 728 Vocalizations

729 During the normal animal care taking procedures, it was realized that HAB mice have a strong  
730 disposition to vocalize in the audible hearing range, if lifted at their tails (e.g. at changing cages) and  
731 especially when they lose grip from a grid cage top. Although there have been previous attempts to  
732 standardize this cage-grid vocalization test (*Whitney, 1970*), in our study the tail-suspension test  
733 (TST) was employed, a behavioral test which typically aims to assess depression-like behavior in  
734 mice (*Steru et al., 1985*). For this test, the animal was affixed roughly 2 cm above the tail root to  
735 a  $\varnothing 5 \text{ mm}$  vertical stainless steel rod (20 cm above ground) using heat sterilization tape. Other  
736 tapes can be used, but it was found that this sort of material is characterized by its rather low  
737 adhesion to murine skin and its excellent removability without introducing skin irritations. The  
738 test was carried out within a sound-attenuating chamber. The test duration was 5 minutes, and  
739 the animals vocalization was monitored using high-quality sonic/ultrasonic recording equipment  
740 (Avisoft UltraSoundGate USG 116-200, condenser microphone CM16/CMPA). Offline analysis was  
741 carried out using custom written Python2.7 scripts.

## 742 Standard Laboratory Procedures & Analysis

### 743 Stereotaxic Implantation and Virus Injections

744 All stereotaxic surgical procedures were carried out similarly and shall be briefly described. Specifics  
745 for cannulae implantations and virus injections are provided if necessary. Before the surgery, the  
746 animal was weighed and analgesic treatment (200 mg/kg Vetalgin, Intervet, in saline, s.c.) was  
747 administered 15 minutes prior to any other interventions. During this time, all surgical instruments  
748 have been heat sterilized and wiped with 70 % ethanol. Then the animal was transferred to the  
749 anesthesia induction chamber and slowly anesthetized with isoflurane (0-4 % in oxygenated air,  
750 EverFlo Oxygen Concentrator). The absence of the eyelid and paw withdrawal reflex indicated  
751 surgical tolerance and the animal was transferred to the stereotaxic frame (Leica Biosystems,  
752 AngleTwo), where it was fixed using non-rupture/non-traumatic ear bars and a snout clamp. The  
753 anesthesia was kept constant with 2-2.5 % isoflurane, while the animals body temperature was  
754 constantly monitored and controlled (37.5°C) using a rodent rectal probe, heating blanket and  
755 a animal temperature controller (WPI Inc. ATC2000). The eyes were kept moisturized using eye  
756 ointment (Bepanthen® eye and nose ointment). Further the animals head was shaved using either  
757 serrated scissors or an electric shaver. Excess cut hair was removed with cotton swabs soaked  
758 with lidocaine (Sigma #L7757, 10 % (w/v) in 70 % ethanol) which in addition exerted an additional  
759 cutaneous analgesic effect. Using sharp scissor, the skin above the skull was opened from 1 mm

760 caudal to lambda to 2 mm rostral to bregma. The periosteum was removed with clean cotton swabs  
761 soaked in lidocaine solution followed by 3 % hydrogen peroxide. Now, using a small and stiff probe  
762 the AngleTwo system was calibrated with the position of bregma and lambda and medial-lateral  
763 (ML) and dorsoventral (DV) deviations were corrected if necessary to read less than 50  $\mu\text{m}$  utilizing  
764 the manufacturing tolerances of the mouse skull adapters' dovetail rails. In order to correct the skull  
765 rotation, two contra-lateral coordinates on the skull surface were targeted (ML  $\pm 2.0$  mm, AP -1.82  
766 mm) and the respective DV coordinates were noted. If a deviation  $>50$   $\mu\text{m}$  was noticed, the ear bars  
767 were released and the initial rotation was corrected. Once the position of the skull was sufficiently  
768 accurate, implantation or virus injection was conducted. After these procedures the animals were  
769 weighed and their general health and healing status was assessed and recorded on a daily basis for  
770 5 consecutive days and in addition the animals received post-surgical analgesic treatment (1 mg/kg  
771 Metacam, Böhringer Ingelheim, in saline, s.c., daily). For viral injections, a 5  $\mu\text{l}$  Hamilton syringe  
772 (7634-01/00) equipped with a blunt 33 gauge needle or a 10  $\mu\text{l}$  WPI Inc. syringe (NANOFIL) equipped  
773 with a 34 gauge beveled needle (NF34BV-2) in conjunction with a motorized micropump (WPI Inc.  
774 UMP3) and the respective micropump controller (WPI Inc. MICRO4) was used. The injection rate  
775 was set to 80 nl/min. For the experiments involving the pharmacogenetic manipulation of the  
776 SC in LAB mice, 350 nl of adeno-associated-virus serotype-5 (AAV), expressing either the active  
777 DREADD (AAV5-CaMKII $\alpha$ -hM3Dq-mCherry, #AV6333,  $N=12$ ) or just the reporter fluorophore (controls,  
778 AAV5-CaMKII $\alpha$ -mCherry, #AV4809c,  $N=12$ ), have been injected (ML  $\pm 0.9$  mm, AP -3.64 mm, DV -1.75  
779 mm). All viruses were purchased from the Gene Therapy Center Vector Core of the University  
780 of North Carolina, Chapel Hill and were diluted, using 350 mM NaCl solution, to reach a target  
781 titer of  $1.7 \times 10^{12}$  vg/ml. For the injection, first, the target drilling site was marked with a pencil  
782 on the skull surface, and the skull was penetrated using a  $\emptyset 0.5$  mm burr with counterclockwise  
783 concentric movements until the intact dura mater becomes visible. Using a hypodermic needle,  
784 whose foremost sharp tip was gently bent to the outside by tipping it onto a polished stainless  
785 steel surface in order to form a micro-miniature hook-like instrument, was used to first remove the  
786 remaining skull pieces and secondly to open the dura at the site of injection. The injection needle  
787 was slowly lowered to reach the target site and the injection was initiated. After the injection the  
788 needle was raised for 100  $\mu\text{m}$  and left for additional 10 minutes in order to allow the virus to diffuse.  
789 Subsequently, the needle was removed and the procedure was repeated on the contralateral side.  
790 During the injection the wound was kept moisturized using saline, in order to prevent brain tissue  
791 from sticking onto the needle and to aid the subsequent cutaneous suture. After the injection,  
792 using resorbable, sterile, surgical needled suture material (VetSuture fastPGLA 5/0, 13 mm reverse  
793 cutting needle 3/8), the wound was closed with 4-6 intermittent stitches, and treated with iodine  
794 solution (BRAUNOL<sup>®</sup>). The incubation time for the virus to reach stable expression was  $>5$  weeks.

#### 795 Guide Cannula Implantation & Local Muscimol Injections

796 For the local injection of muscimol within the IPAG of HAB mice ( $N=14$ ), two 3.0 mm long, 26 gauge  
797 guide cannulae (WPI Inc.) have been implanted using an angle of  $\pm 25^\circ$  at ML  $\pm 1.02$  mm, AP -4.25  
798 mm and DV -1.55 mm. As the internal injection needle had a length of 4.0 mm, the ultimate injection  
799 site was ML  $\pm 0.6$  mm, AP -4.25 mm and DV -2.45 mm. One skull screw per hemisphere above the  
800 hippocampus (ML  $\pm 1.5$ , AP -1.27) allowed a mechanically stable attachment of the cannulae to  
801 the skull using dental cement (Paladur<sup>®</sup>, Heraeus-Kulzer). Iodine solution (BRAUNOL<sup>®</sup>) was used to  
802 disinfect the wound. After the implantation, dummy injection needles with a dust cap and a length  
803 of 3.5 mm were inserted into the guide cannulae in order to prevent clogging. The animals were  
804 allowed to recover for more than 2 weeks after the surgery. The injection of MUSC or fMUSC or  
805 vehicle (aCSF) before the EPM and vocalization task was conducted in the anesthetized (2-2.5 %  
806 isoflurane) animal. The injection was carried out using an ultra micropump (WPI Inc. UMP3) and the  
807 injection rate was set to 100 nl/min whereby volume of 100 nl was injected. 45 minutes after the  
808 injection, the animals were subjected to the behavioral paradigm.

## 809 Histology

810 For histological verification of injection and implantation sites, the animals were deeply anesthetized  
811 using a mixture of ketamine (50 mg/kg, Essex Pharma GmbH, Germany) and xylazinehydrochloride  
812 (5 mg/kg, Rompun, Bayer Health Care, Germany) injected systemically (100  $\mu$ l per 10 g body weight,  
813 i.p.). Subsequently the animals were given an overdose of isoflurane to induce respiratory arrest  
814 (final anesthesia) and transcardially perfused with cold physiological saline followed by 4% (w/v)  
815 paraformaldehyde (PFA) in phosphate buffered saline (PBS, final concentrations in mM: 136.89 NaCl,  
816 2.68 KCl, 10 Na<sub>2</sub>HPO<sub>4</sub>, 1.76 KH<sub>2</sub>PO<sub>4</sub>; pH adjusted to 7.4 using HCl). The brains of the animals were  
817 post-fixed in PFA solution for >24 h at 4°C. In order to prevent the implant tracks from collapsing  
818 upon removal, the entire heads of the animals were post-fixed for >48 h. The brains were further  
819 placed in 30% (w/v) sucrose in PBS solution for >36 h at 4°C for cryoprotection in order to increase  
820 tissue rigidity. Subsequently the brains were dry dabbed and carefully frozen by repeatedly dipping  
821 the brain, held at the medulla, into the cold 2-methylbutane on dry ice and stored at -80°C. Coronal  
822 tissue sections of 35  $\mu$ m, cut in several series, were prepared using a cryostat (Thermo Scientific  
823 Microm HM560). Sections were collected directly on microscopy slides (SuperFrost®, Menzel-Gläser,  
824 Germany). For proteinaceous fluorophores the specimens were covered and preserved using  
825 antifade mounting medium (VECTASHIELD® HardSet H-1500, VECTOR Laboratories, UK) containing  
826 the nuclear counterstain 4',6-diamidino-2-phenylindole (DAPI). Some series were stained using the  
827 standard Nissl staining method in order to reveal the gross anatomical structures. In brief, the  
828 specimens were dehydrated using (in v/v) 80%, 90%, 2x100% ethanol (30 seconds per step), stained  
829 in 0.1% (w/v) cresyl violet solution in double distilled water acidified with 300  $\mu$ l glacial acetic acid  
830 for 30 seconds. Subsequently the specimens were differentiated in 100% isopropyl alcohol (for  
831 30 seconds) followed by 100% xylene for (>5 min). The cresyl violet stained sections were covered  
832 and preserved using DPX mounting medium. For the preparation of retinal section the eyes of  
833 the perfused animals were removed and stored in 4% PFA at 4°C and the retinas were extracted.  
834 Retinal sections (30  $\mu$ m) were obtained (*Ivanova et al., 2013*) using a cryostat and the specimens  
835 were stained with haematoxylin and eosin.

## 836 Genotyping for *Pde6b*<sup>rd1</sup>

837 The genotyping for *Pde6b*<sup>rd1</sup> was carried out according to Chang et al. 2013 (*Chang et al., 2013*).  
838 In brief, genomic DNA was extracted from tail biopsies (B6, CD1, HAB, NAB, LAB, N=4 per strain)  
839 by adding 100  $\mu$ l 50 mM NaOH aqueous solution to each sample (per 1.5 mL reaction tube)  
840 followed by 30 minutes incubation at 99°C. Subsequently the samples were allowed to cool down  
841 and 30  $\mu$ l of 1 M Tris-HCl aqueous solution was added per sample. Finally the samples were  
842 thoroughly vortexed and cell debris was removed by brief centrifugation and the samples were  
843 stored at -20°C. For the polymerase chain reaction (PCR), 2.5  $\mu$ l PCR buffer (Thermo Scientific,  
844 ThermoPrimeTaq 10x Buffer), 2.5  $\mu$ l MgCl<sub>2</sub> (25 mM), 1  $\mu$ l deoxynucleoside triphosphate (dNTP,  
845 10 mM) mix (Thermo Scientific, 18427-088), 1  $\mu$ l dissolved G1 primer, 1  $\mu$ l G2 primer, 1  $\mu$ l XMV  
846 primer, 0.2  $\mu$ l Taq DNA polymerase (Thermo Scientific, ThermoPrime, #AB-0301/B) and 14.8  $\mu$ l  
847 double distilled water was mixed with 1  $\mu$ l of genomic DNA solution. The primer sequences were as  
848 follows: G1 (5'-CCTGCATGTGAACCCAGTATTCT ATC-3'), G2 (5'-CTACAGCCCCTCTCCAAGGTTATAG-3')  
849 and XMV (5'-AAGCTA GCTGCAGTAACGCCATTT-3'). The idea of this three primer design is that while  
850 G1 and G2 result in a PCR product of 240 base pairs (bp) from normal non-mutant animals, G2  
851 and XMV generate a larger (560 bp) product from the *rd1* mutant allele. The thermal cycler PCR  
852 protocol consisted of the following steps: denaturation for 3 minutes at 95°C, followed by 34 cycles  
853 of annealing (30 seconds, 55°C) and extension (1 minute, 72°C) terminated with a final cycle at  
854 72°C for 5 minutes and the subsequent incubation at 4°C. The amplified DNA was analyzed using  
855 agarose gel electrophoresis and a subsequent ethidium bromide staining.

## 856 Manganese-enhanced MRI

857 The animals (HAB  $N=31$ , NAB  $N=26$ , LAB  $N=30$ ) were injected with a low dose of manganese chloride  
858 (30 mg/kg in saline, i.p.) for eight consecutive days (8×30/24 h) prior to the scanning procedure, see  
859 Grünecker et al. 2010 (*Grünecker et al., 2010*). The MRI experiments were performed in a 7T MRI  
860 scanner (Avance Biospec 70/30, Bruker BioSpin, Ettlingen, Germany) at 24 h after the last injection,  
861 with the animals being anesthetized with isoflurane ( $\approx 1.5$ -1.7% in oxygenated air). Body tempera-  
862 ture was monitored and kept constant in the range 34-36°C. A saddle-shaped receiver coil was used  
863 for signal acquisition.  $T_1$ -weighted images were acquired using a 3D gradient echo pulse sequence  
864 (repetition time TR = 50 ms, echo time TE = 3.2 ms) using a matrix of 128×128×128 at a field of view  
865 of 16×16×18 mm<sup>3</sup>, yielding a final resolution of 125×125×140.6  $\mu\text{m}^3$ . 10 averages were acquired.  
866 In addition, 3D  $T_2$ -weighted images were acquired using a rapid acquisition relaxation enhanced  
867 (RARE) pulse sequence (TR = 1 s, TE = 10 ms) with the same spatial resolution as mentioned above,  
868 and two averages. This resulted in a total imaging time of approximately 2 hours per animal. The  
869 reconstructed images (Paravision, Bruker BioSpin, Ettlingen, Germany) were further analyzed using  
870 the statistical parametric mapping package SPM5 (using the spm mouse toolbox) and SPM8 (using  
871 the new segment option for bias correction) ([www.fil.ion.ucl.ac.uk/spm/](http://www.fil.ion.ucl.ac.uk/spm/)).

872  
873 The acquired images of all animals were segmented exploiting mouse specific tissue probability  
874 maps, and bias corrected images were obtained. Then, images were spatially normalized in several  
875 steps: 1. Normalization of all images (including brain and extracranial tissue) to a representative  
876 single animal image and calculation of the mean normalized image. 2. Creation of a brain mask on  
877 the mean normalized image. Brain extraction in native space using the back-transformed mean  
878 brain mask. 3. Normalization of the brain extracted images to the group template. Finally, images  
879 were smoothed using a Gaussian kernel of eight times the image resolution. Data were further  
880 analyzed in SPM using a full factorial design with three conditions (HAB, NAB and LAB), global mean  
881 correction and global normalization using ANCOVA. A pairwise voxel-based comparison between  
882 HAB vs. NAB and LAB vs. NAB (FDR  $p<0.001$ , cluster extent  $>20$ ) revealed the differential manganese  
883 accumulation ().

## 884 Statistical Analysis

885 All data are presented as mean values  $\pm$  standard error (SEM). Statistical analysis has been per-  
886 formed using GraphPad Prism 7. One way analysis of variance (in some cases for repeated  
887 measures) was followed by Bonferroni post-hoc analysis. 2-way analysis of variance (ANOVA) for  
888 repeated measures (rmANOVA) was followed by Bonferroni post-hoc analysis. Non-parametric  
889 analysis was carried out using the Mann-Whitney  $U$  test. Contingency tables were analyzed using  
890  $\chi^2$  test if the tables were of sufficient size, otherwise the Fisher's exact test was used. A  $p<0.05$   
891 was considered statistically significant. First, group differences were verified by ANOVA, followed -  
892 if appropriate - by post-hoc tests which considered differences between HAB vs. NAB or LAB vs.  
893 NAB. As the manifestation of *high-anxiety* and *low-anxiety* phenotypes via selective breeding most  
894 likely involved different complex multigenic changes, a direct comparison of HAB against LAB is  
895 inappropriate. Therefore we only compared HAB and LAB to the common NAB control.

## 896 Author Contributions

897 AJG conceptualization, data curation, formal analysis, investigation, methodology, project adminis-  
898 tration, software, supervision, visualization, writing - original draft preparation; NA investigation,  
899 visualization; SAB investigation; PK formal analysis; DEH investigation; MN resources; ME investiga-  
900 tion; SFK methodology, investigation; CJR methodology, investigation; BTB methodology, investiga-  
901 tion, visualization; MC resources, software, supervision, visualization, writing - review & editing; CTW  
902 formal analysis, methodology, project administration, resources, supervision, validation, writing -  
903 original draft preparation, review & editing.

904 **Supporting information**

905 S1 Mov.

906 **Supplemental Movie 1**

907 Movie explaining the Robocat task also known as the *Panic Box*.

908 S1 Fig.

909 **Supplemental Figure 1**

Unaltered latency for end-exploration in the IndyMaze task with DZP treatment.

## Supplemental Figure 1

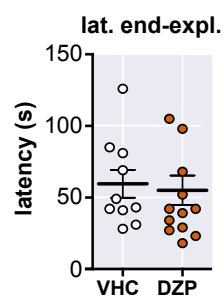

910



911 S2 Fig.  
 912 **Supplemental Figure 2**  
 Complete MEMRI Data Set.

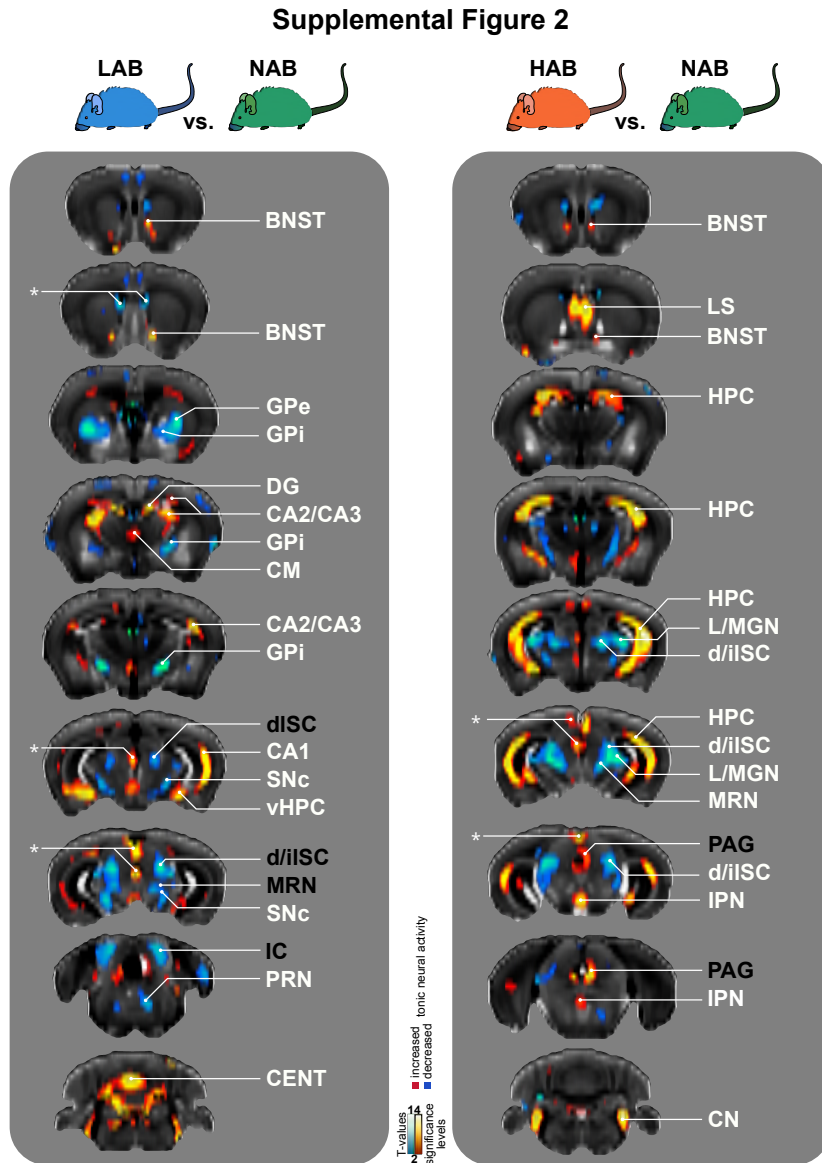

Asterisks indicate potential artifacts which have been observed to occur close to the brain surface or the ventricular system. **BNST** bed nucleus of the stria terminalis, **CA1-3** cornu ammonis 1-3, **CENT** central lobule of the cerebellum, **CM** central medial nucleus of the thalamus, **CN** cochlear nucleus, **DG** dentate gyrus, **d/iISC** deep/intermediate layers of the superior colliculus, **GPe** globus pallidus external segment, **GPI** globus pallidus internal segment, **HPC** hippocampus proper, **IPN** interpedunclopontine nucleus, **LS** lateral septal nucleus, **L/MGM** lateral/medial geniculate, **MRN** midbrain reticular nucleus, **PAG** periaqueductal gray, **PRN** pontine reticular nucleus, **SNC** substantia nigra pars compacta, **vHPC** ventral portion of the hippocampus proper.

913

914 S3 Fig.

915 **Supplemental Figure 3**

Summary of histological analysis of virus spread in LAB animals and additional EPM measures.

**Supplemental Figure 3**

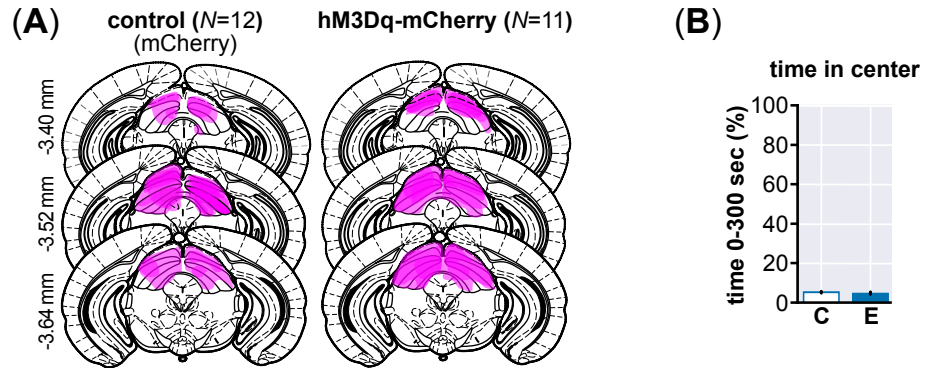

916

917 S4 Fig.

918 **Supplemental Figure 4**

Summary of histological analysis of MUSC spread in HAB animals and additional EPM measures.

**Supplemental Figure 4**

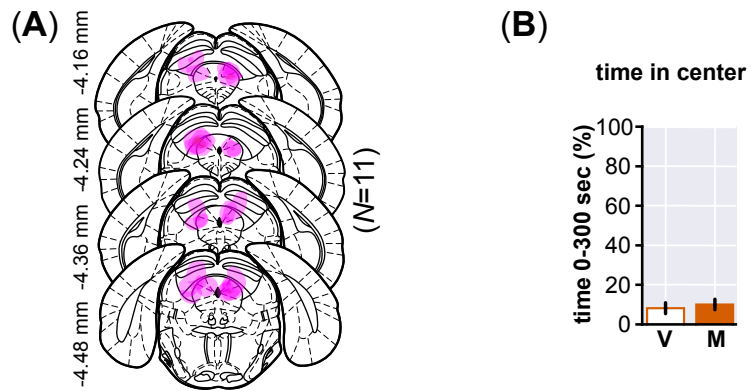

919

## References

- 920  
921 **Abdeljalil J**, Hamid M, Abdel-Mouttalib O, Stéphane R, Raymond R, Johan A, et al. The optomotor response: a  
922 robust first-line visual screening method for mice. *Vision Res.* 2005; 45(11):1439–46.
- 923 **Adhikari A**, Topiwala MA, Gordon JA. Single units in the medial prefrontal cortex with anxiety-related firing  
924 patterns are preferentially influenced by ventral hippocampal activity. *Neuron.* 2011; 71(5):898–910.
- 925 **Adhikari A**, Topiwala M, Gordon JA. Synchronized activity between the ventral hippocampus and the medial  
926 prefrontal cortex during anxiety. *Neuron.* 2010; 65(2):257–69.
- 927 **Almada RC**, Genewsky AJ, Heinz DE, Kaplick PM, Coimbra NC, Wotjak CT. Stimulation of the nigrotectal pathway  
928 at the level of the superior colliculus reduces threat recognition and causes a shift from avoidance to approach  
929 behavior. *Front Neural Circuits.* 2018; 12:36.
- 930 **American Psychiatric Association.** Diagnostic and statistical manual of mental disorders (5th ed.). Arlington,  
931 VA; 2013.
- 932 **Amir A**, Lee SC, Headley DB, Herzallah MM, Pare D. Amygdala Signaling during Foraging in a Hazardous  
933 Environment. *J Neurosci.* 2015; 35(38):12994–3005.
- 934 **Anderzhanova E**, Kirmeier T, Wotjak CT. Animal models in psychiatric research: The RDoC system as a new  
935 framework for endophenotype-oriented translational neuroscience. *Neurobiol Stress.* 2017; 7:47–56.
- 936 **Anthony TE**, Dee N, Bernard A, Lerchner W, Heintz N, Anderson DJ. Control of stress-induced persistent anxiety  
937 by an extra-amygdala septohypothalamic circuit. *Cell.* 2014; 156(3):522–36.
- 938 **Armbruster BN**, Li X, Pausch MH, Herlitze S, Roth BL. Evolving the lock to fit the key to create a family of G  
939 protein-coupled receptors potentially activated by an inert ligand. *Proc Natl Acad Sci U S A.* 2007; 104(12):5163–8.
- 940 **Avrabis C**, Sotnikov SV, Dine J, Markt PO, Holsboer F, Landgraf R, et al. Real-Time Imaging of Amygdalar Network  
941 Dynamics In Vitro Reveals a Neurophysiological Link to Behavior in a Mouse Model of Extremes in Trait  
942 Anxiety. *J Neurosci.* 2013; 33(41):16262–7.
- 943 **Baarendse PJ**, van Grootheest G, Jansen RF, Pieneman AW, Ogren SO, Verhage M, Stiedl O. Differential involve-  
944 ment of the dorsal hippocampus in passive avoidance in C57bl/6j and DBA/2J mice. *Hippocampus.* 2008;  
945 18(1):11–9.
- 946 **Bandler R FNPJ Keay KA.** Central circuits mediating patterned autonomic activity during active vs. passive  
947 emotional coping. *Brain Res Bull.* 2000; 53(1):95–104.
- 948 **Bangasser DA CPGJSVR Lee CS.** Manganese-enhanced magnetic resonance imaging (MEMRI) reveals brain  
949 circuitry involved in responding to an acute novel stress in rats with a history of repeated social stress. *Physiol*  
950 *Behav.* 2013; 122:228–36.
- 951 **Bannerman DM**, Rawlins JN, McHugh SB, Deacon RM, Yee BK, Bast T, et al. Regional dissociations within the  
952 hippocampus—memory and anxiety. *Neurosci Biobehav Rev.* 2004; 28(3):273–83.
- 953 **Bedenk BT**, Almeida-Corrêa S, Jurik A, Dedic N, Grünecker B, Genewsky AJ, et al. Mn<sup>2+</sup> dynamics in manganese-  
954 enhanced MRI (MEMRI): Ca<sub>v</sub>1.2 channel-mediated uptake and preferential accumulation in projection termi-  
955 nals. *Neuroimage.* 2018; 169:374–382.
- 956 **Belzung C**, Griebel G. Measuring normal and pathological anxiety-like behaviour in mice: a review. *Behav Brain*  
957 *Res.* 2001; 125(1-2):141–9.
- 958 **Bissig D**, Berkowitz BA. Manganese-enhanced MRI of layer-specific activity in the visual cortex from awake and  
959 free-moving rats. *Neuroimage.* 2009; 44(3):627–35.
- 960 **Blanchard DC**, Griebel G, Blanchard RJ. The Mouse Defense Test Battery: pharmacological and behavioral  
961 assays for anxiety and panic. *Eur J Pharmacol.* 2003; 463(1-3):97–116.
- 962 **Blanchard RJ**, Blanchard DC. An ethoexperimental analysis of defense, fear, and anxiety. In: N M, Andrews  
963 G, editors. *Otago conference series, No. 1. Anxiety* Dunedin, New Zealand: University of Otago Press; 1990.p.  
964 124–133.
- 965 **Blanchard RJ**, Blanchard DC, Rodgers J, Weiss SM. The characterization and modelling of antipredator defensive  
966 behavior. *Neurosci Biobehav Rev.* 1990; 14(4):463–72.

- 967 **Blanchard RJ**, Flannelly KJ, Blanchard DC. Defensive behaviors of laboratory and wild *Rattus norvegicus*. *J Comp*  
968 *Psychol.* 1986; 100(2):101–7.
- 969 **Blanchard RJ**, Griebel G, Henrie JA, Blanchard DC. Differentiation of anxiolytic and panicolytic drugs by effects  
970 on rat and mouse defense test batteries. *Neurosci Biobehav Rev.* 1997; 21(6):783–9.
- 971 **Borelli KG**, Brandão ML. Effects of ovine CRF injections into the dorsomedial, dorsolateral and lateral columns  
972 of the periaqueductal gray: a functional role for the dorsomedial column. *Horm Behav.* 2008; 53(1):40–50.
- 973 **Bunck M**, Czibere L, Horvath C, Graf C, Frank E, Keßler MS, et al. A Hypomorphic Vasopressin Allele Prevents  
974 Anxiety-Related Behavior. *PLoS ONE.* 2009; 4(4):e5129.
- 975 **Calhoun GG**, Tye KM. Resolving the neural circuits of anxiety. *Nat Neurosci.* 2015; 18(10):1394–404.
- 976 **Campos AC**, Guimarães FS. Evidence for a potential role for TRPV1 receptors in the dorsolateral periaqueductal  
977 gray in the attenuation of the anxiolytic effects of cannabinoids. *Prog Neuropsychopharmacol Biol Psychiatry.*  
978 2009; 33(8):1517–21.
- 979 **Chang B**, Hurd R, Wang J, Nishina P. Survey of common eye diseases in laboratory mouse strains. *Invest*  
980 *Ophthalmol Vis Sci.* 2013; 54(7):4974–81.
- 981 **Chen KH**, Chen DY, Liang KC. Functional connectivity changes during consolidation of inhibitory avoidance  
982 memory in rats: a manganese-enhanced MRI study. *Chin J Physiol.* 2013; 56(5):269–81.
- 983 **Chen W**, Tenney J, Kulkarni P, King JA. Imaging unconditioned fear response with manganese-enhanced MRI  
984 (MEMRI). *Neuroimage.* 2007; 37(1):221–9.
- 985 **Choi JS**, Kim JJ. mygdala regulates risk of predation in rats foraging in a dynamic fear environment. *Proc Natl*  
986 *Acad Sci U S A.* 2010; 107(50):21773–7.
- 987 **Cole JC**, Rodgers RJ. Ethological comparison of the effects of diazepam and acute/chronic imipramine on the  
988 behaviour of mice in the elevated plus-maze. *Pharmacol Biochem Behav.* 1995; 52(3):473–8.
- 989 **Cryan JF**, Holmes A. The ascent of mouse: advances in modelling human depression and anxiety. *Nat Rev Drug*  
990 *Discov.* 2005; 4(9):775–90.
- 991 **Deniau JM**, Degos B, Bosch C, Maurice N. Deep brain stimulation mechanisms: beyond the concept of local  
992 functional inhibition. *Eur J Neurosci.* 2010; 32(7):1080–91.
- 993 **Drapeau P**, Nachshen DA. Manganese fluxes and manganese-dependent neurotransmitter release in presynap-  
994 tic nerve endings isolated from rat brain. *J Physiol.* 1984; 348:493–510.
- 995 **Ennaceur A**. Tests of unconditioned anxiety - pitfalls and disappointments. *Physiol Behav.* 2014; 135:55–71.
- 996 **Erhardt A**, Czibere L, Roeske D, Lucae S, Unschuld PG, Ripke S, et al. TMEM132D, a new candidate for anxiety  
997 phenotypes: evidence from human and mouse studies. *Mol Psychiatr.* 2011; 16(4):647–63.
- 998 **Eschenko O**, Canals S, Simanova I, Beyerlein M, Murayama Y, Logothetis NK. Mapping of functional brain activity  
999 in freely behaving rats during voluntary running using manganese-enhanced MRI: implication for longitudinal  
1000 studies. *Neuroimage.* 2010; 49(3):2544–55.
- 1001 **Evans DA**, Stempel V, Vale R, Ruehle S, Lefler Y, Branco T. A synaptic threshold mechanism for computing escape  
1002 decisions. *Nature.* 2018; 558(7711):590–594.
- 1003 **Fanselow MS**, Lester LS. A functional behavioristic approach to aversively motivated behavior: Predatory  
1004 imminence as a determinant of the topography of defensive behavior. In: Bolles RC, Beecher MD, editors.  
1005 *Evolution and Learning.* Hillsdale, NJ, US: Lawrence Erlbaum Associates, Inc.; 1988.p. 185–212.
- 1006 **Felix-Ortiz AC**, Beyeler A, Seo C, Leppla CA, Wildes CP, Tye KM. BLA to vHPC inputs modulate anxiety-related  
1007 behaviors. *Neuron.* 2013; 79(4):658–64.
- 1008 **Felix-Ortiz AC**, Burgos-Robles A, Bhagat ND, Leppla CA, Tye KM. Bidirectional modulation of anxiety-related and  
1009 social behaviors by amygdala projections to the medial prefrontal cortex. *Neuroscience.* 2016; 321:197–209.
- 1010 **Füchsl AM**, Neumann ID, Reber SO. Stress Resilience: A Low-Anxiety Genotype Protects Male Mice From the  
1011 Consequences of Chronic Psychosocial Stress. *Endocrinology.* 2014; 155(1):117–26.

- 1012 **Gaburro S**, Stiedl O, Giusti P, Sartori SB, Landgraf R, Singewald N. A mouse model of high trait anxiety shows  
1013 reduced heart rate variability that can be reversed by anxiolytic drug treatment. *Int J Neuropsychopharmacol.*  
1014 2011; 14(10):1341–55.
- 1015 **Gavin CE**, Gunter KK, Gunter TE. Manganese and calcium efflux kinetics in brain mitochondria. Relevance to  
1016 manganese toxicity. *Biochem J.* 1990; 266(2):329–34.
- 1017 **Gomez JL**, Bonaventura J, Lesniak W, Mathews WB, Sysa-Shah P, Rodriguez LA, et al. Chemogenetics revealed:  
1018 DREADD occupancy and activation via converted clozapine. *Science.* 2017; 357(6350):503–507.
- 1019 **Grant EC**, Mackintosh JH. A Comparison of the Social Postures of Some Common Laboratory Rodents. *Behaviour.*  
1020 1963; 21(3):246–59.
- 1021 **Gray JA**, McNaughton N. *The Neuropsychology of anxiety: an enquiry into the functions of the septo-*  
1022 *hippocampal system.* Oxford, UK: Oxford University Press; 2000.
- 1023 **Green DG**, Kapousta-Bruneau NV, Hitchcock PF, Keller SA. Electrophysiology and density of retinal neurons in  
1024 mice with a mutation that includes the Pax2 locus. *Invest Ophthalmol Vis Sci.* 1997; 38(5):919–29.
- 1025 **Grewal SS**, Shepherd JK, Bill DJ, Fletcher A, Dourish CT. Behavioural and pharmacological characterisation of the  
1026 canopy stretched attend posture test as a model of anxiety in mice and rats. *Psychopharmacology (Berl).*  
1027 1997; 133(1):29–38.
- 1028 **Griebel G**, Belzung C, Perrault G, Sanger DJ. Differences in anxiety-related behaviours and in sensitivity to  
1029 diazepam in inbred and outbred strains of mice. *Psychopharmacology (Berl).* 2000; 148(2):164–70.
- 1030 **Grünecker B**, Kaltwasser SF, Peterse Y, Sämann PG, Schmidt MV, Wotjak CT, et al. Fractionated manganese  
1031 injections: effects on MRI contrast enhancement and physiological measures in C57BL/6 mice. *NMR Biomed.*  
1032 2010; 23(8):913–21.
- 1033 **Hall CS**. Emotional behavior in the rat. I. Defecation and urination as measures of individual differences in  
1034 emotionality. *J Comp Psychol.* 1934; 18(3):385–403.
- 1035 **Heinz DE**, Genewsky A, Wotjak CT. Enhanced anandamide signaling reduces flight behavior elicited by an  
1036 approaching robo-beetle. *Neuropharmacology.* 2017; 126:233–241.
- 1037 **Hoch T**, Kreitz S, Gaffling S, Pischetsrieder M, Hess A. Manganese-enhanced magnetic resonance imaging for  
1038 mapping of whole brain activity patterns associated with the intake of snack food in ad libitum fed rats. *PLoS*  
1039 *One.* 2013; 8(2):e55354.
- 1040 **Holmes A**, Rodgers RJ. Influence of spatial and temporal manipulations on the anxiolytic efficacy of chlor-  
1041 diazepoxide in mice previously exposed to the elevated plus-maze. *Neurosci Biobehav Rev.* 1999; 23(7):971–80.
- 1042 **Ivanova E**, Toychiev AH, Yee CW, Sagdullaev BT. Optimized protocol for retinal wholemount preparation for  
1043 imaging and immunohistochemistry. *J Vis Exp.* 2013; 82:e51018.
- 1044 **Jimenez JC**, Su K, Goldberg AR, Luna VM, Biane JS, Ordek G, et al. Anxiety Cells in a Hippocampal-Hypothalamic  
1045 Circuit. *Neuron.* 2018; 97(3):670–83.
- 1046 **Kaesermann HP**. Stretched attend posture, a non-social form of ambivalence, is sensitive to a conflict-reducing  
1047 drug action. *Psychopharmacology (Berl).* 1986; 89(1):31–7.
- 1048 **Kessler MS**, Murgatroyd C, Bunck M, Czibere L, Frank E, Jacob W, et al. Diabetes insipidus and, partially, low  
1049 anxiety-related behaviour are linked to a SNP-associated vasopressin deficit in LAB mice. *Eur J Neurosci.* 2007;  
1050 26(10):2857–64.
- 1051 **Kheirbek MA**, Drew LJ, Burghardt NS, Costantini DO, Tannenholz L, Ahmari SE, et al. Differential control of  
1052 learning and anxiety along the dorsoventral axis of the dentate gyrus. *Neuron.* 2013; 77(5):955–68.
- 1053 **Kim SY**, Adhikari A, Lee SY, Marshel JH, Kim CK, Mallory CS, et al. Diverging neural pathways assemble a  
1054 behavioural state from separable features in anxiety. *Nature.* 2013; 496(7444):219–23.
- 1055 **King AJ**. The superior colliculus. *Curr Biol.* 2004; 14(9):R335–8.
- 1056 **Komada M**, Takao K, T M. Elevated plus maze for mice. *J Vis Exp.* 2008; 22:1088.

- 1057 **Kosel M**, Sturm V, Frick C, Lenartz D, Zeidler G, Brodesser D, et al. Mood improvement after deep brain  
1058 stimulation of the internal globus pallidus for tardive dyskinesia in a patient suffering from major depression.  
1059 *J Psychiatr Res.* 2007; 41(9):801–3.
- 1060 **Krömer SA**, Keßler MS, Milfay D, Birg IN, Bunck M, Czibere L, et al. Identification of Glyoxalase-I as a Protein  
1061 Marker in a Mouse Model of Extremes in Trait Anxiety. *J Neurosci.* 2005; 25(17):4375–84.
- 1062 **Kumar S**, Black SJ, Hultman R, Szabo ST, DeMaio KD, Du J, et al. Cortical control of affective networks. *J Neurosci.*  
1063 2013; 33(3):1116–29.
- 1064 **Laine MA**, Sokolowska E, Dudek M, Callan SA, Hyytiä P, Hovatta I. Brain activation induced by chronic psychosocial  
1065 stress in mice. *Sci Rep.* 2017; 7(1):15061.
- 1066 **Landgraf R**, Kessler MS, Bunck M, Murgatroyd C, Spengler D, Zimbelmann M, et al. Candidate genes of anxiety-  
1067 related behavior in HAB/LAB rats and mice: focus on vasopressin and glyoxalase-I. *Neurosci Biobehav Rev.*  
1068 2007; 31(1):89–102.
- 1069 **Landgraf R**, Wigger A. Born to be anxious: neuroendocrine and genetic correlates of trait anxiety in HAB rats.  
1070 *Stress.* 2003; 6(2):111–9.
- 1071 **LeDoux J**. Rethinking the emotional brain. *Neuron.* 2012; 73(4):653–76.
- 1072 **LeDoux JE**. Coming to terms with fear. *Proc Natl Acad Sci U S A.* 2014; 111(8):2871–8.
- 1073 **LeDoux JE**. Semantics, Surplus Meaning, and the Science of Fear. *Trends Cogn Sci.* 2017; 21(5):303–306.
- 1074 **LeDoux JE**, Pine DS. Using Neuroscience to Help Understand Fear and Anxiety: A Two-System Framework. *Am J*  
1075 *Psychiatry.* 2016; 173(11):1083–93.
- 1076 **Liebsch G**, Wotjak CT, Landgraf R, Engelmann M. Septal vasopressin modulates anxiety-related behaviour in  
1077 rats. *Neurosci Lett.* 1996; 217(2-3):101–4.
- 1078 **Lima VC**, Molchanov ML, Aguiar DC, Campos AC, Guimarães FS. Modulation of defensive responses and anxiety-  
1079 like behaviors by group I metabotropic glutamate receptors located in the dorsolateral periaqueductal gray.  
1080 *Prog Neuropsychopharmacol Biol Psychiatry.* 2008; 32(1):178–85.
- 1081 **Maren S**. Neurobiology of Pavlovian fear conditioning. *Annu Rev Neurosci.* 2001; 24:897–931.
- 1082 **McNaughton N**, Corr PJ. A two-dimensional neuropsychology of defense: fear/anxiety and defensive distance.  
1083 *Neurosci Biobehav Rev.* 2004; 28(3):285–305.
- 1084 **McNaughton N**, Corr PJ. Survival circuits and risk assessment. *Curr Opin Behav Sci.* 2018; 24:14–20.
- 1085 **Menard J**, Treit D. Lateral and medial septal lesions reduce anxiety in the plus-maze and probe-burying tests.  
1086 *Physiol Behav.* 1996; 60(3):845–53.
- 1087 **Mendes-Gomes J**, Nunes-de Souza RL. Anxiolytic-like effects produced by bilateral lesion of the periaqueductal  
1088 gray in mice: Influence of concurrent nociceptive stimulation. *Behav Brain Res.* 2009; 203(2):180–7.
- 1089 **Millan MJ**. The neurobiology and control of anxious states. *Prog Neurobiol.* 2003; 70(2):83–244.
- 1090 **Muigg P**, Scheiber S, Salchner P, Bunck M, Landgraf R, Singewald N. Differential stress-induced neuronal  
1091 activation patterns in mouse lines selectively bred for high, normal or low anxiety. *PLoS One.* 2009; 4(4):e5346.
- 1092 **Muthuraju S**, Talbot T, Brandão ML. Dopamine D2 receptors regulate unconditioned fear in deep layers of the  
1093 superior colliculus and dorsal periaqueductal gray. *Behav Brain Res.* 2016; 297:116–23.
- 1094 **Netto CF**, Guimarães FS. Anxiogenic effect of cholecystokinin in the dorsal periaqueductal gray. *Neuropsychy-*  
1095 *chopharmacology.* 2004; 29(1):101–7.
- 1096 **Oler JA**, Fox AS, Shelton SE, Rogers J, Dyer TD, Davidson RJ, et al. Amygdalar and hippocampal substrates of  
1097 anxious temperament differ in their heritability. *Nature.* 2010; 466(7308):864–8.
- 1098 **Padilla-Coreano N**, Bolkan SS, Pierce GM, Blackman DR, Hardin WD, Garcia-Garcia AL, et al. Direct Ventral  
1099 Hippocampal-Prefrontal Input Is Required for Anxiety-Related Neural Activity and Behavior. *Neuron.* 2016;  
1100 89(4):857–66.

- 1101 **Pang X**, Liu L, Ngolab J, Zhao-Shea R, McIntosh JM, Gardner PD, et al. Habenula cholinergic neurons regulate  
1102 anxiety during nicotine withdrawal via nicotinic acetylcholine receptors. *Neuropharmacology*. 2016; 107:294-  
1103 304.
- 1104 **Pare D**, Quirk GJ. When scientific paradigms lead to tunnel vision: lessons from the study of fear. *npj Science of*  
1105 *Learning*. 2017; 2:6.
- 1106 **Pellman BA**, Kim JJ. What Can Ethobehavioral Studies Tell Us about the Brain's Fear System? *Trends Neurosci*.  
1107 2016; 39(6):420-31.
- 1108 **Pellow S**, Chopin P, File SE, M B. Validation of open:closed arm entries in an elevated plus-maze as a measure of  
1109 anxiety in the rat. *J Neurosci Methods*. 1985; 14(3):149-67.
- 1110 **Perusini JN**, Fanselow MS. Neurobehavioral perspectives on the distinction between fear and anxiety. *Learn*  
1111 *Mem*. 2015; 22(9):417-25.
- 1112 **Pinel JP**, Mana MJ, Ward JA. Stretched-approach sequences directed at a localized shock source by *Rattus*  
1113 *norvegicus*. *J Comp Psychol*. 1989; 103(2):140-8.
- 1114 **Prast JM**, Schardl A, Sartori SB, Singewald N, Saria A, Zernig G. Increased conditioned place preference for cocaine  
1115 in high anxiety related behavior (HAB) mice is associated with an increased activation in the accumbens  
1116 corridor. *Front Behav Neurosci*. 2014; 8:441.
- 1117 **Pugh EN**, Falsini B, Lyubarsky AL. The Origin of the Major Rod- and Cone-Driven Components of the Rodent  
1118 Electroretinogram and the Effect of Age and Light-Rearing History on the Magnitude of These Components.  
1119 In: Williams TP, Thistle AB, editors. *Photostasis and Related Phenomena*. US: Springer; 1998.p. 93-128.
- 1120 **Ratner SC**. Comparative aspects of hypnosis. In: Gordon JE, editor. *Handbook of clinical and experimental*  
1121 *hypnosis*. New York: Macmillan; 1967.p. 550-87.
- 1122 **Ratner SC**. Animals's defenses: Fighting in predatory-prey relations. In: Pliner P, Krames L, Alloway T, editors.  
1123 *Nonverbal communication of aggression*. New York: Plenum; 1975.p. 175-190.
- 1124 **Rodgers RJ**, Lee C, Shepherd JK. Effects of diazepam on behavioural and antinociceptive responses to the elevated  
1125 plus-maze in male mice depend upon treatment regimen and prior maze experience. *Psychopharmacology*  
1126 (Berl). 1992; 106(1):102-10.
- 1127 **Sah A**, Schmuckermair C, Sartori SB, Gaburro S, Kandasamy M, Irschick R, et al. Anxiety- rather than depression-  
1128 like behavior is associated with adult neurogenesis in a female mouse model of higher trait anxiety- and  
1129 comorbid depression-like behavior. *Transl Psychiatry*. 2012; 2:e171.
- 1130 **Santos NR**, Huston JP, Brandão ML. Blockade of histamine H2 receptors of the periaqueductal gray and inferior  
1131 colliculus induces fear-like behaviors. *Pharmacol Biochem Behav*. 2003; 75(1):25-33.
- 1132 **Sartori SB**, Hauschild M, Bunck M, Gaburro S, Landgraf R, Singewald N. Enhanced fear expression in a psy-  
1133 chopathological mouse model of trait anxiety: pharmacological interventions. *PLoS One*. 2011; 6(2):e16849.
- 1134 **Sartori SB**, Landgraf R, Singewald N. The clinical implications of mouse models of enhanced anxiety. *Future*  
1135 *Neurol*. 2011; 6(4):531-71.
- 1136 **Schmuckermair C**, Gaburro S, Sah A, Landgraf R, Sartori SB, Singewald N. Behavioral and neurobiological  
1137 effects of deep brain stimulation in a mouse model of high anxiety- and depression-like behavior. *Neuropsy-*  
1138 *chopharmacology*. 2013; 38(7):1234-44.
- 1139 **Serfilippi LM**, Pallman DR, Gruebbl MM, Kern TJ, B SC. Assessment of retinal degeneration in outbred albino  
1140 mice. *Comp Med*. 2004; 54(1):69-76.
- 1141 **Shang C**, Liu Z, Chen Z, Shi Y, Wang Q, Liu S, et al. A parvalbumin-positive excitatory visual pathway to trigger  
1142 fear responses in mice. *Science*. 2015; 348(6242):1472-7.
- 1143 **Shi X**, Barchini J, Ledesma HA, Koren D, Jin Y, Liu X, et al. Retinal origin of direction selectivity in the superior  
1144 colliculus. *Nat Neurosci*. 2017; 20(4):550-558.
- 1145 **Shin J**, Gireesh G, Kim SW, Kim DS, Lee S, Kim YS, Watanabe M, et al. Phospholipase C beta 4 in the medial  
1146 septum controls cholinergic theta oscillations and anxiety behaviors. *J Neurosci*. 2009; 29(49):15375-85.
- 1147 **Siegle JH**, López AC, Patel YA, Abramov K, Ohayon S, Voigts J. Open Ephys: an open-source, plugin-based  
1148 platform for multichannel electrophysiology. *J Neural Eng*. 2017; 14(4):045003.

- 1149 **Sorregotti T**, Cipriano AC, Cruz FC, Mascarenhas DC, Rodgers RJ, Nunes-de Souza RL. Amygdaloid involvement in  
1150 the defensive behavior of mice exposed to the open elevated plus-maze. *Behav Brain Res.* 2018; 338:159–65.
- 1151 **Sotnikov S**, Wittmann A, Bunck M, Bauer S, Deussing J, Schmidt M, et al. Blunted HPA axis reactivity reveals gluco-  
1152 corticoid system dysbalance in a mouse model of high anxiety-related behavior. *Psychoneuroendocrinology.*  
1153 2014; 48:41–51.
- 1154 **Sotnikov SV**, Markt PO, Umriukhin AE, Landgraf R. Genetic predisposition to anxiety-related behavior predicts  
1155 predator odor response. *Behav Brain Res.* 2011; 225(1):230–4.
- 1156 **Sousa N**, Almeida OF, Wotjak CT. A hitchhiker's guide to behavioral analysis in laboratory rodents. *Genes Brain*  
1157 *Behav.* 2006; 5(Suppl 2):5–24.
- 1158 **Spielberg S**, Marshall F, *Raiders of the Lost Ark.* Lucasfilm Ltd.; 1981.
- 1159 **Steru L**, Chermat R, Thierry B, Simon P. The tail suspension test: a new method for screening antidepressants in  
1160 mice. *Psychopharmacology (Berl).* 1985; 85(3):367–70.
- 1161 **Sztainberg Y**, Kuperman Y, Justice N, Chen A. An anxiolytic role for CRF receptor type 1 in the globus pallidus. *J*  
1162 *Neurosci.* 2011; 31(48):17416–24.
- 1163 **Talalaenko AN**, Krivobok G, Bulgakova NP, Pankrat'ev DV. Functional roles of the monoaminergic and  
1164 aminoacidergic mechanisms of the dorsal pallidum in anxiety of different aversive origins. *Neurosci Behav*  
1165 *Physiol.* 2008; 38(2):115–8.
- 1166 **Tang X**, Wu D, Gu LH, Nie BB, Qi XY, Wang YJ, et al. Spatial learning and memory impairments are associated  
1167 with increased neuronal activity in 5XFAD mouse as measured by manganese-enhanced magnetic resonance  
1168 imaging. *Oncotarget.* 2016; 7(36):57556–57570.
- 1169 **Tasan RO**, Bukovac A, Peterschmitt YN, Sartori SB, Landgraf R, Singewald N, et al. Altered GABA transmission in  
1170 a mouse model of increased trait anxiety. *Neuroscience.* 2011; 183:71–80.
- 1171 **Terzian AL**, Aguiar DC, Guimarães FS, Moreira FA. Modulation of anxiety-like behaviour by Transient Receptor  
1172 Potential Vanilloid Type 1 (TRPV1) channels located in the dorsolateral periaqueductal gray. *Eur Neuropsy-*  
1173 *chopharmacol.* 2009; 19(3):188–95.
- 1174 **Thaung C**, Arnold K, Jackson IJ, Coffey PJ. Presence of visual head tracking differentiates normal sighted from  
1175 retinal degenerate mice. *Neurosci Lett.* 2002; 325(1):21–4.
- 1176 **Tovote P**, Fadok JP, Lüthi A. Neuronal circuits for fear and anxiety. *Nat Rev Neurosci.* 2015; 16(6):317–31.
- 1177 **Tröster AI**, Fields JA, Wilkinson SB, Pahwa R, Miyawaki E, Lyons KE, et al. Unilateral pallidal stimulation for Parkin-  
1178 son's disease: neurobehavioral functioning before and 3 months after electrode implantation. *Neurology.*  
1179 1997; 49(4):1078–83.
- 1180 **Tye KM**, Prakash R, Kim SY, Fenno LE, Grosenick L, Zarabi H, et al. Amygdala circuitry mediating reversible and  
1181 bidirectional control of anxiety. *Nature.* 2011; 471(7338):358–62.
- 1182 **Whitney G**. Ontogeny of sonic vocalizations of laboratory mice. *Behav Genet.* 1970; 1(3):269–73.
- 1183 **Yamaguchi T**, Danjo T, Pastan I, Hikida T, Nakanishi S. Distinct roles of segregated transmission of the septo-  
1184 habenular pathway in anxiety and fear. *Neuron.* 2013; 78(3):537–44.
- 1185 **Yang H**, Yang J, Xi W, Hao S, Luo B, He X, et al. Laterodorsal tegmentum interneuron subtypes oppositely regulate  
1186 olfactory cue-induced innate fear. *Nat Neurosci.* 2016; 19(2):283–9.
- 1187 **Yen YC**, Anderzhanova E, Bunck M, Schuller J, Landgraf R, Wotjak CT. Co-segregation of hyperactivity, active  
1188 coping styles, and cognitive dysfunction in mice selectively bred for low levels of anxiety. *Front Behav Neurosci.*  
1189 2013; 7:103.
- 1190 **Yen YC**, Gassen NC, Zellner A, Rein T, Landgraf R, Wotjak CT, et al. Glycogen synthase kinase-3 $\beta$  inhibition in the  
1191 medial prefrontal cortex mediates paradoxical amphetamine action in a mouse model of ADHD. *Front Behav*  
1192 *Neurosci.* 2015; 9:67.
- 1193 **Yen YC**, Mauch CP, Dahlhoff M, Micale V, Bunck M, Sartori SB, et al. Increased levels of conditioned fear  
1194 and avoidance behavior coincide with changes in phosphorylation of the protein kinase B (AKT) within the  
1195 amygdala in a mouse model of extremes in trait anxiety. *Neurobiol Learn Mem.* 2012; 98(1):56–65.



- 1196 **Zhang Y**, Jiang Y, Shao S, Zhang C, Liu FY, Wan Y, Yi M. Inhibiting medial septal cholinergic neurons with DREADD  
1197 alleviated anxiety-like behaviors in mice. *Neurosci Lett.* 2017; 638:139–44.
- 1198 **Zhao-Shea R**, DeGroot SR, Liu L, Vallaster M, Pang X, Su Q, et al. Increased CRF signalling in a ventral tegmental  
1199 area-interpeduncular nucleus-medial habenula circuit induces anxiety during nicotine withdrawal. *Nat*  
1200 *Commun.* 2015; 6:6770.

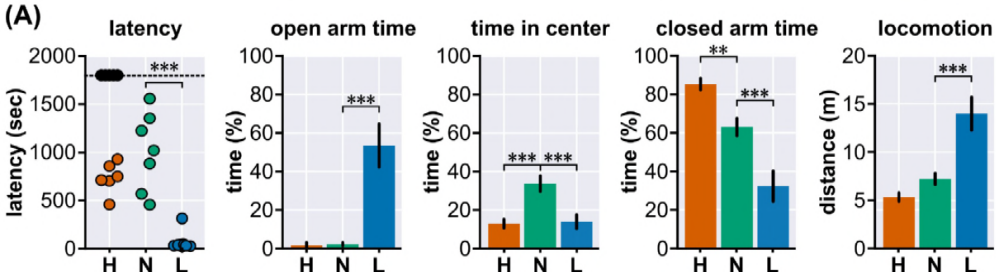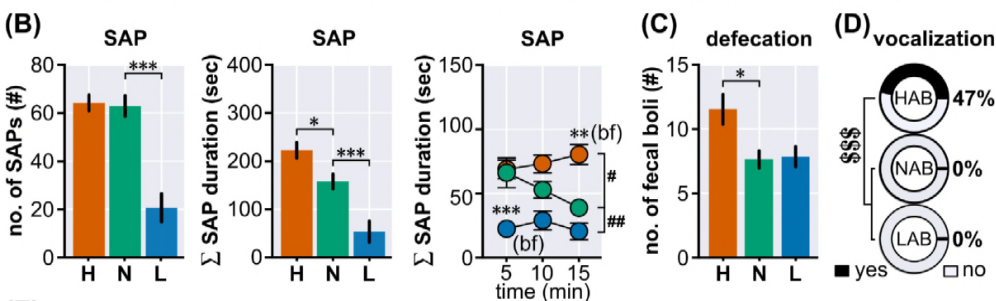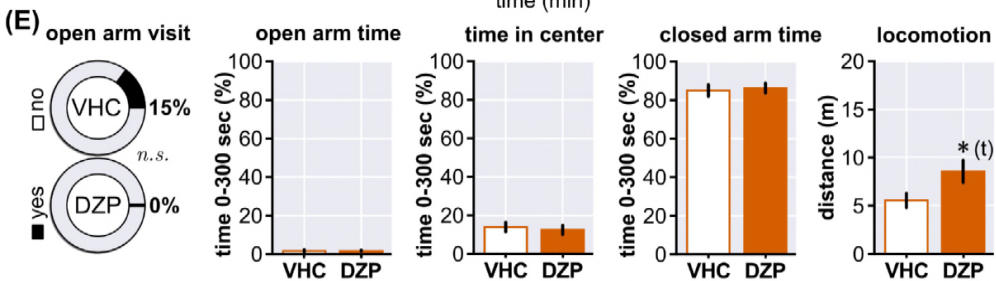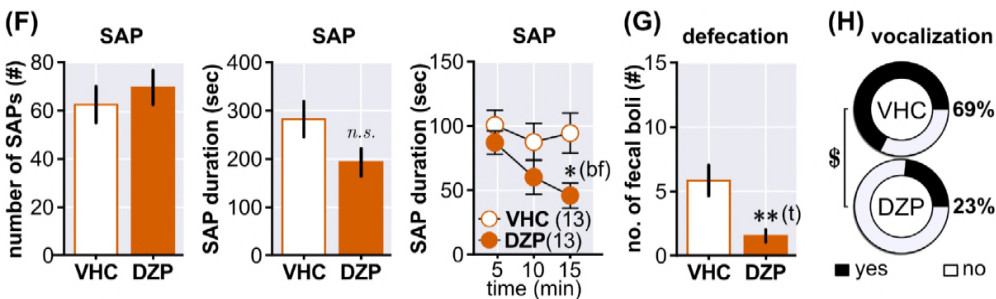

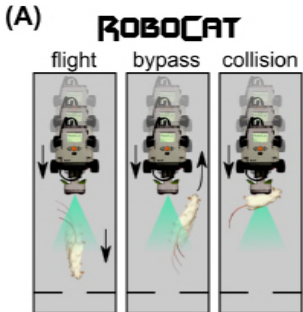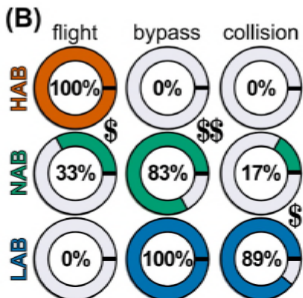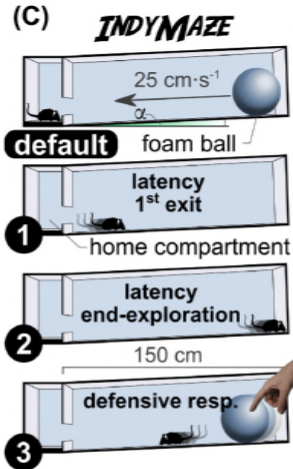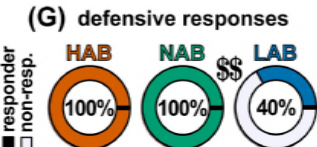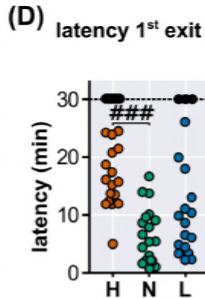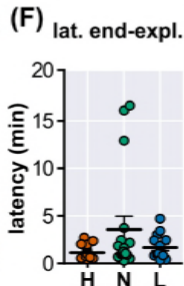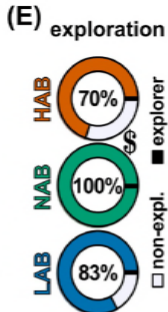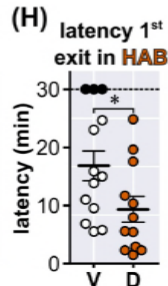

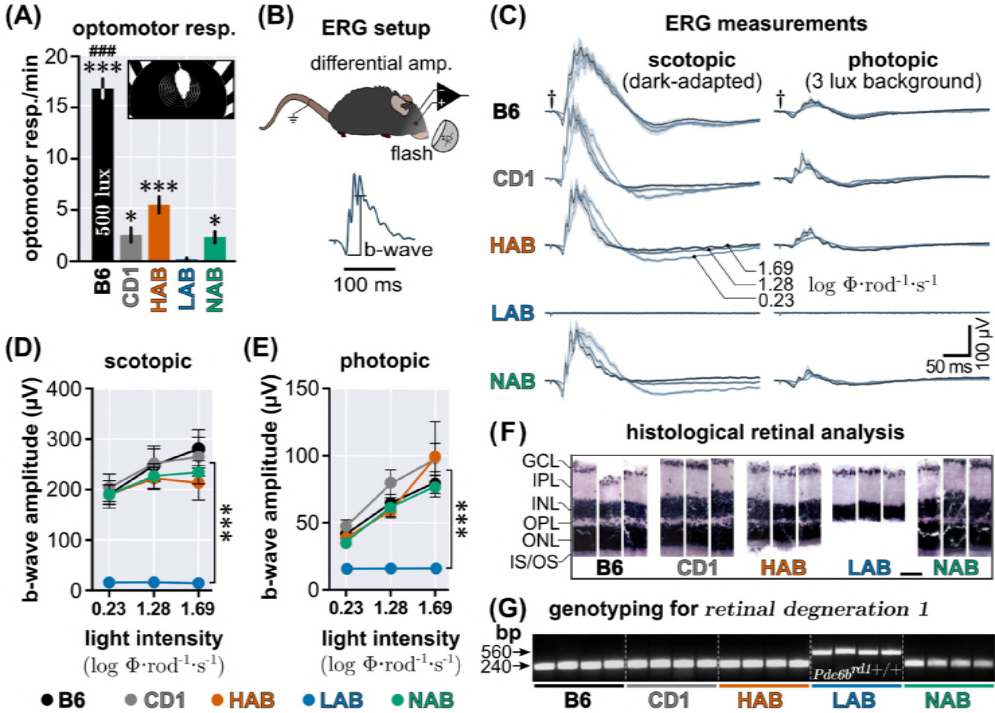

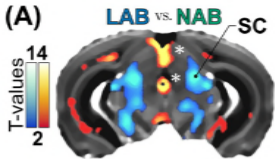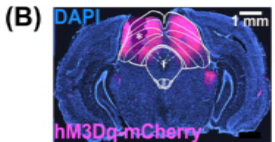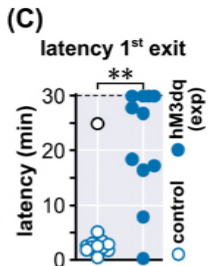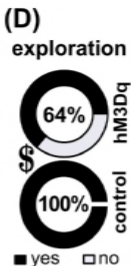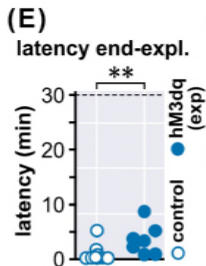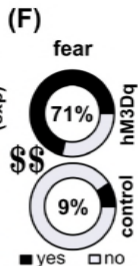

### elevated plus maze (EPM)

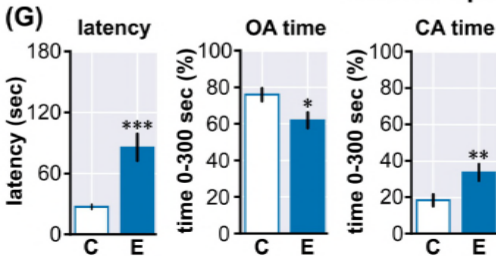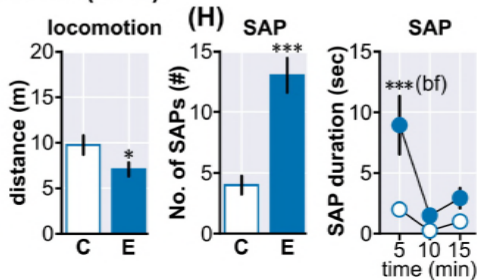

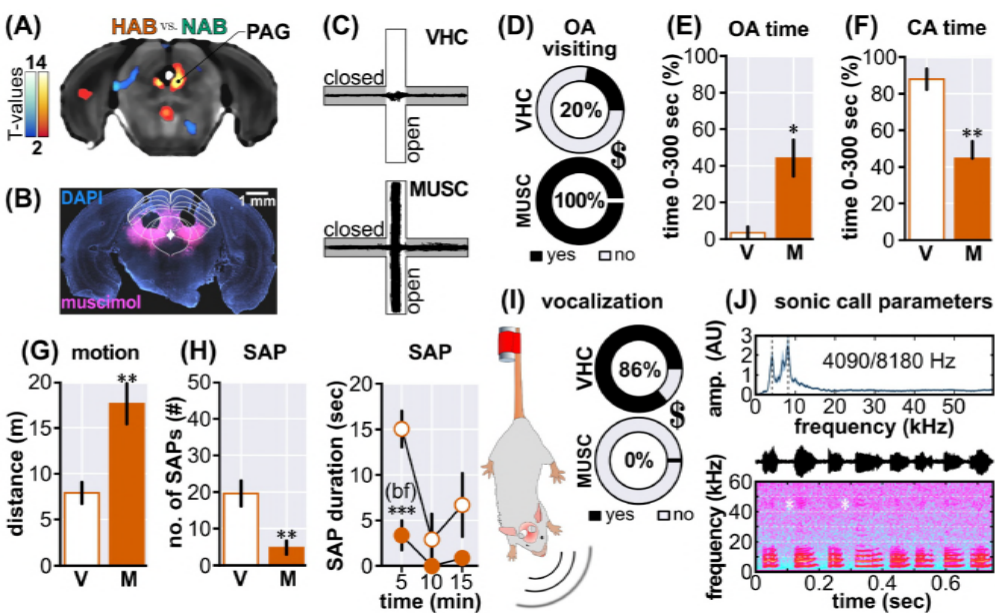

# Supplemental Figure 1

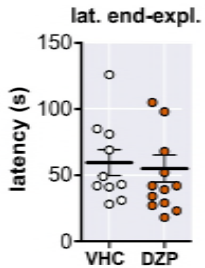

## Supplemental Figure 2

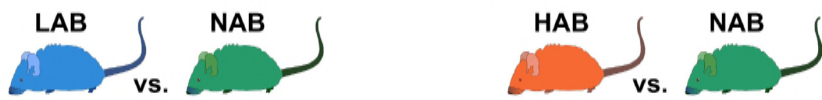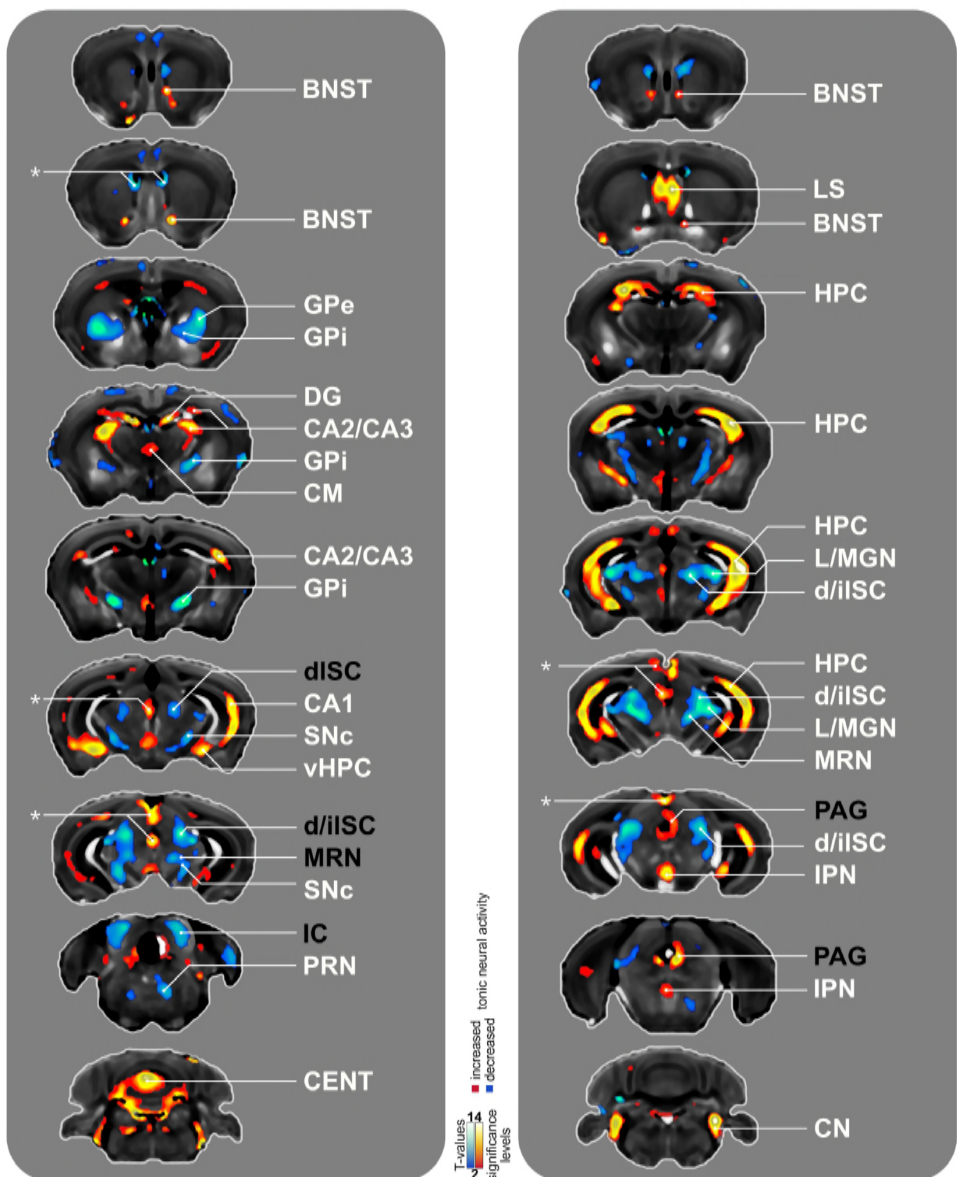

Asterisks indicate potential artifacts which have been observed to occur close to the brain surface or the ventricular system. **BNST** bed nucleus of the stria terminalis, **CA1-3** cornu ammonis 1-3, **CENT** central lobule of the cerebellum, **CM** central medial nucleus of the thalamus, **CN** cochlear nucleus, **DG** dentate gyrus, **d/iISC** deep/intermediate layers of the superior colliculus, **GPe** globus pallidus external segment, **GPi** globus pallidus internal segment, **HPC** hippocampus proper, **IPN** interpedunculo-pontine nucleus, **LS** lateral septal nucleus, **L/MGM** lateral/medial geniculate, **MRN** midbrain reticular nucleus, **PAG** periaqueductal gray, **PRN** pontine reticular nucleus, **SNc** substantia nigra pars compacta, **vHPC** ventral portion of the hippocampus proper.



## Supplemental Figure 3

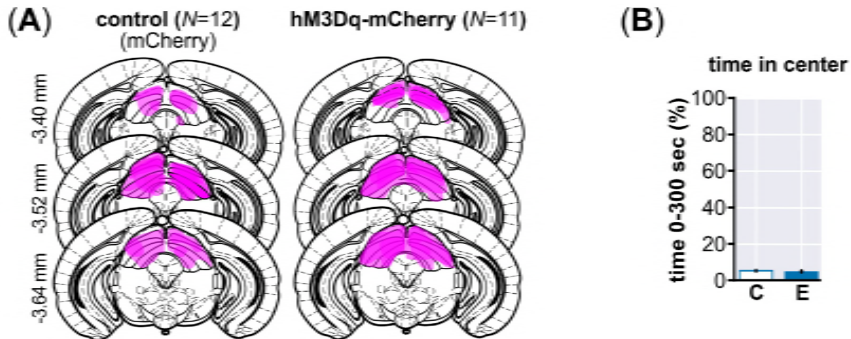

## Supplemental Figure 4

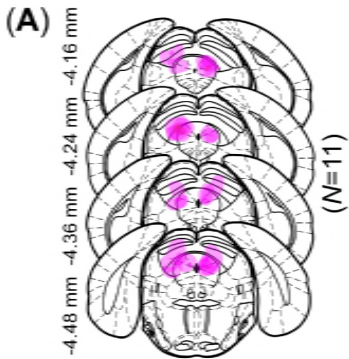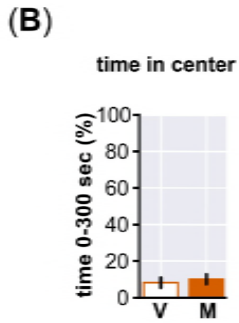

Source: http://biorxiv.org/content/10.1101/385823v1.full.pdf
